# Supplementary material for: Occurrence, Bioaccumulation, Metabolism and Ecotoxicity of Fluoroquinolones in the Aquatic Environment: A Review
Source: MDPI journal article supplement (doi:10.3390/toxics11120966), 2023-11-29
Supplement: s1 [file s1]

# Supplementary Materials: Occurrence, bioaccumulation, metabolism and ecotoxicity of fluoroquinolones in the aquatic environment: A review

Mengnan Shen 1, Yi Hu 1, Ke Zhao 1, Chenyang Li 1, Binshuo Liu 1, Ming Li 1, Chen Lyu 1, Lei Sun 2,\* and Shuang Zhong 3,\*

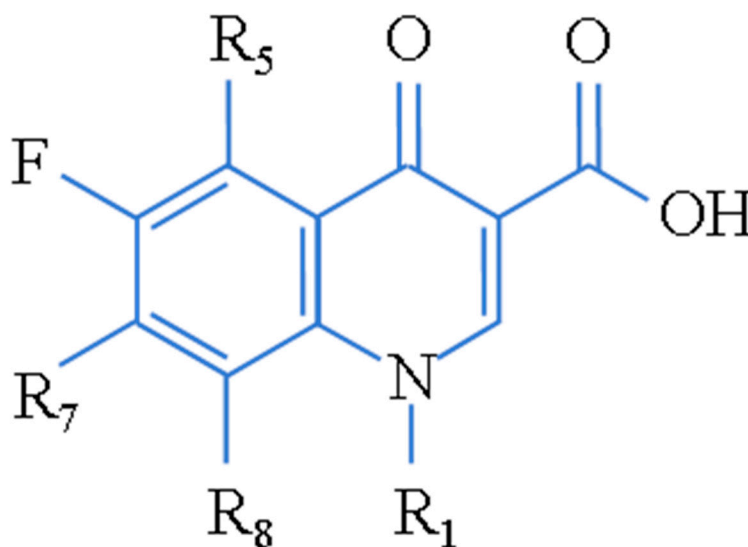

**Figure S1.** The structural formula of FQ.

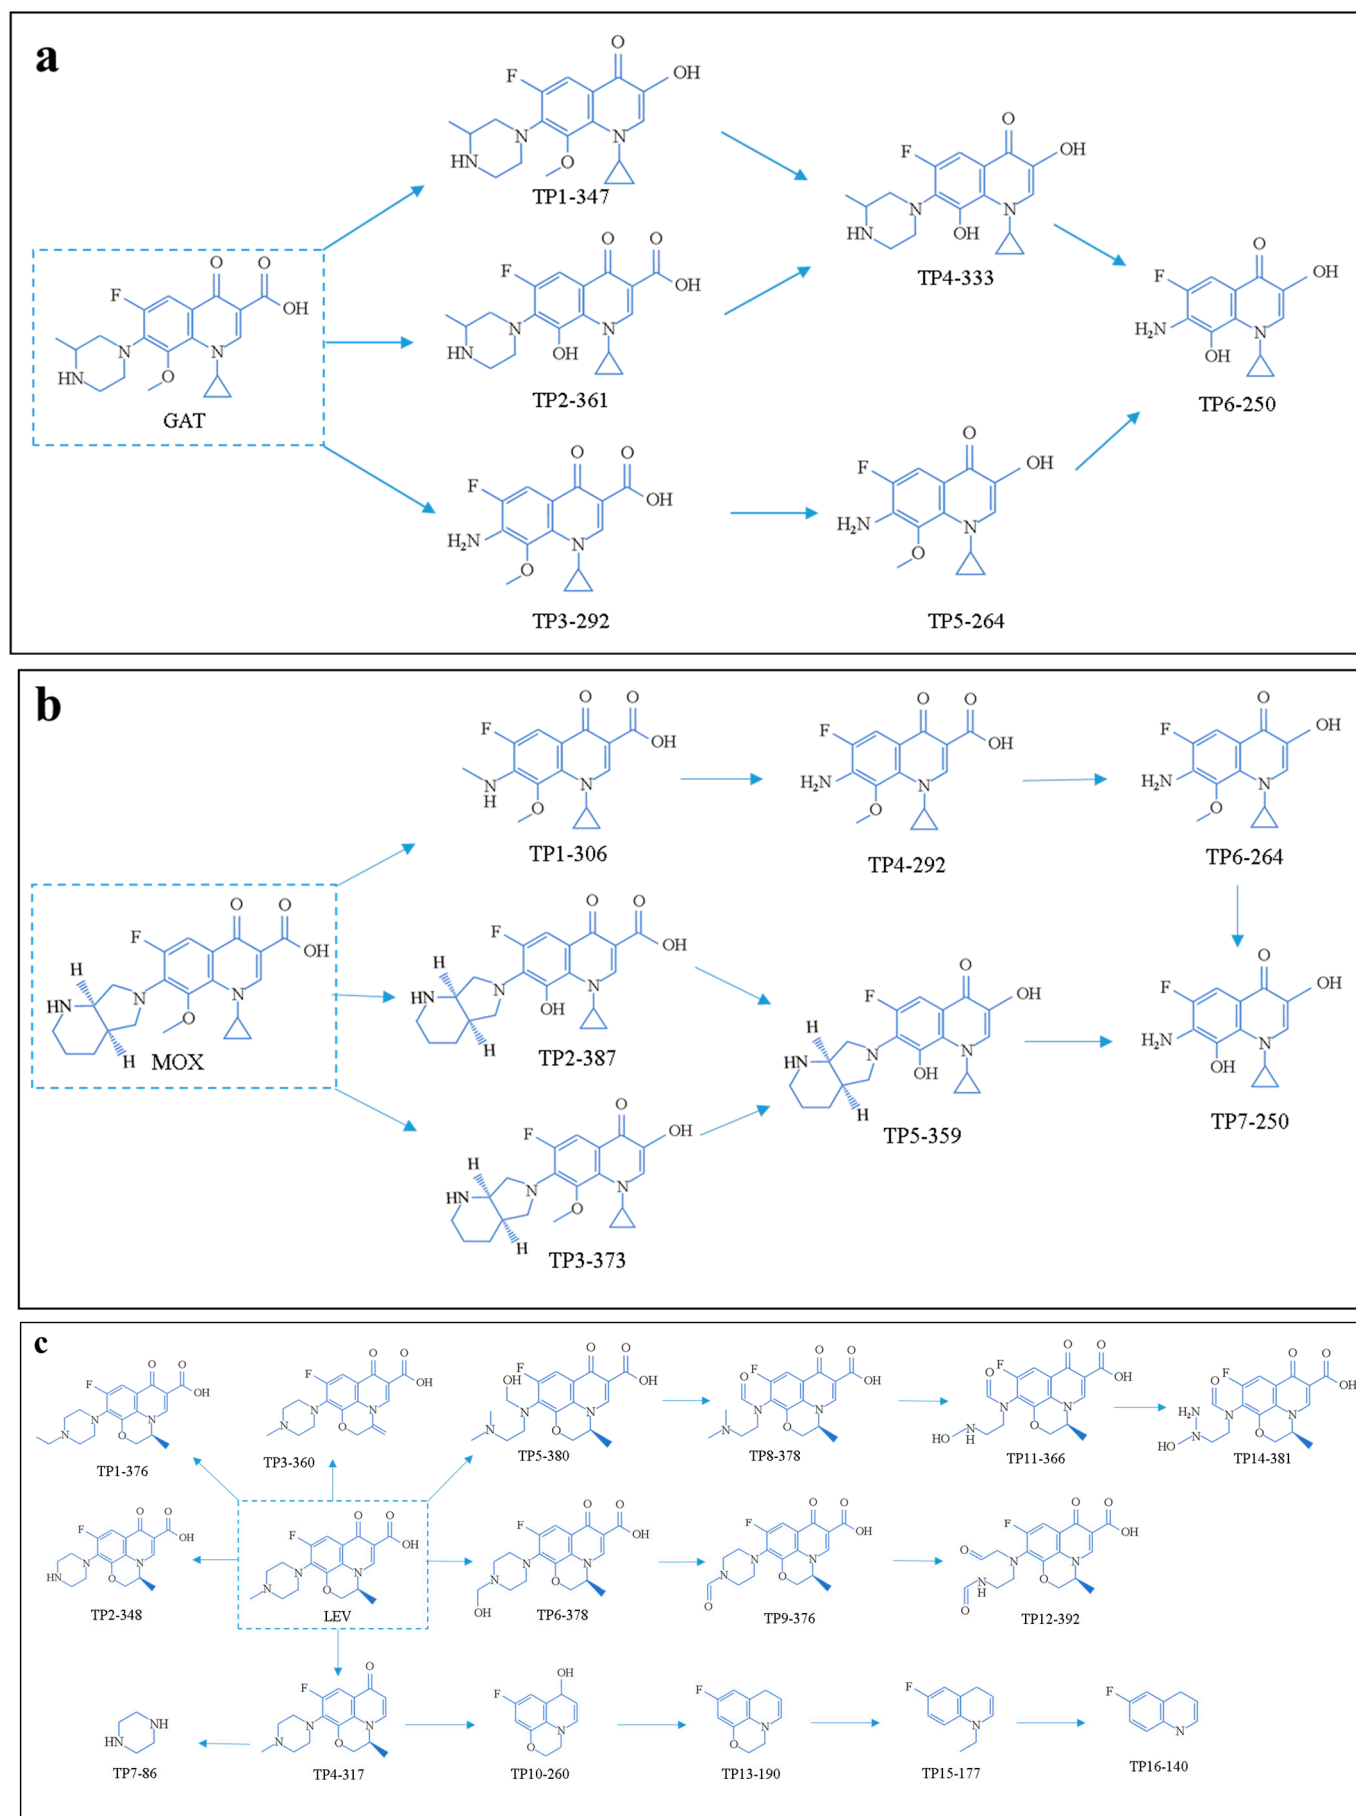

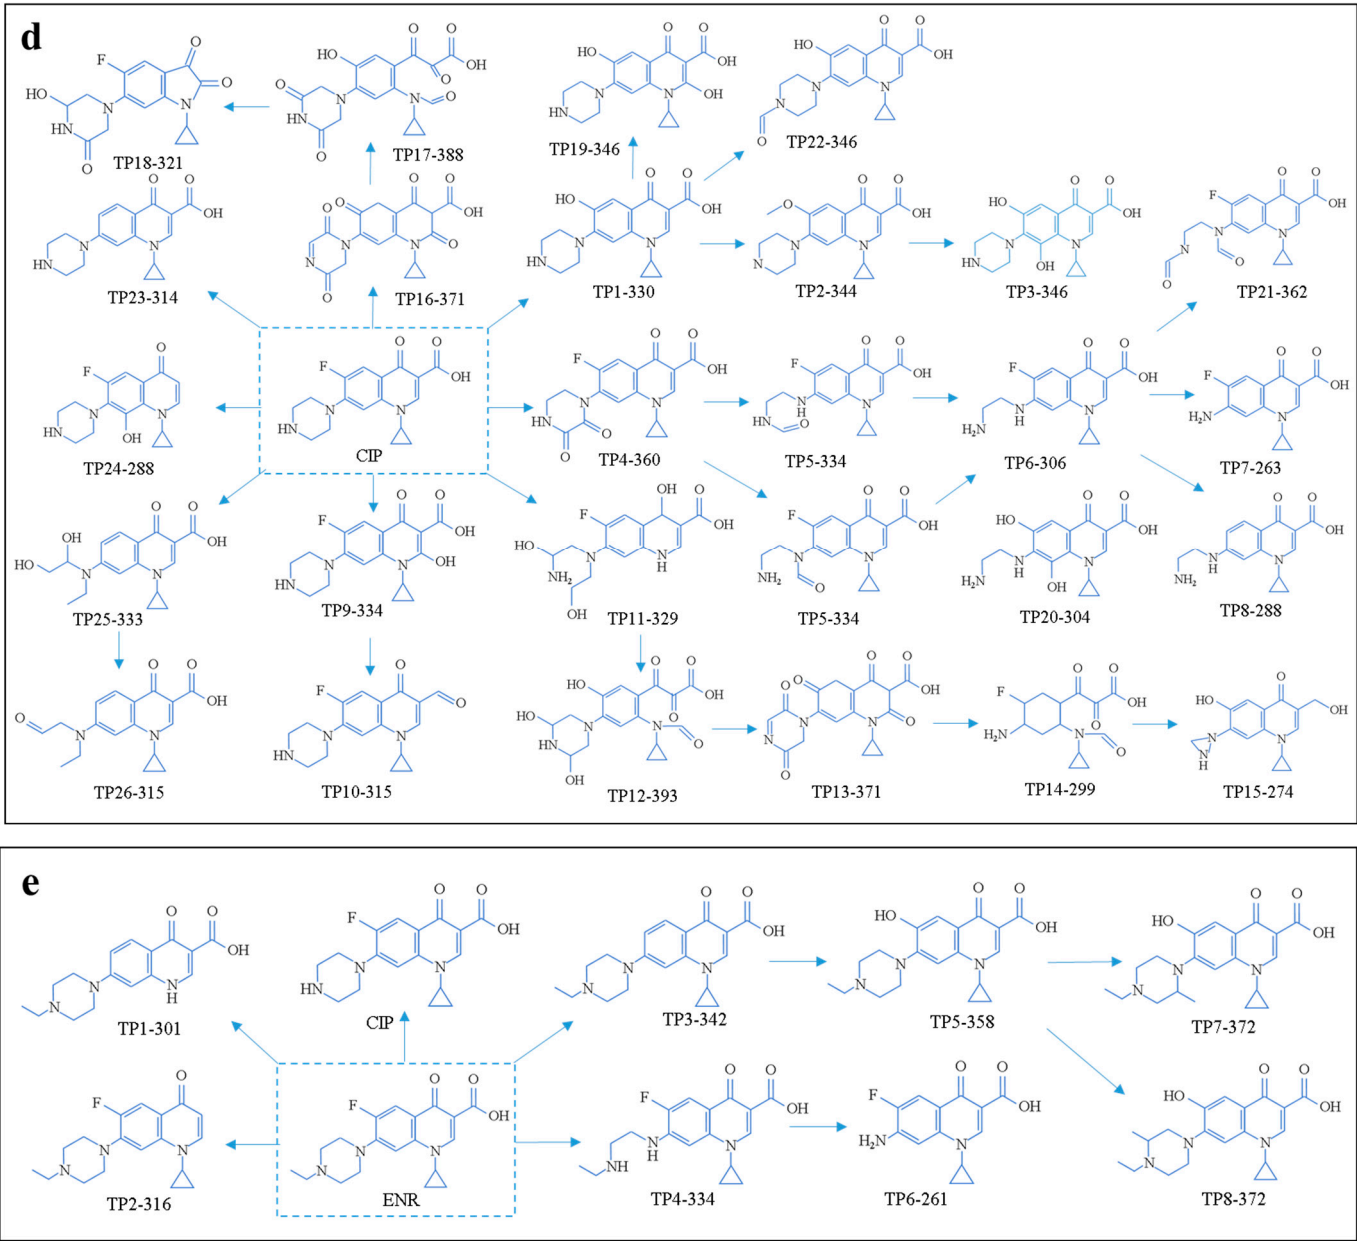

**Figure S2.** The metabolites and possible pathways of GAT (a), MOX (b), LEV (c), CIP (d), and ENR (e) biodegradation in aquatic organisms. Table S1. Physicochemical properties of selected FQs.

**Table S2.** Minimum, maximum, mean, and median concentrations of representative FQs detected in different surface water.

| Compound | Molecular | Chemical Structure | CAS    | Molecular | Log | pKa | References |
|----------|-----------|--------------------|--------|-----------|-----|-----|------------|
|          | Formula   |                    | number | Mass      | Kow |     |            |

|               |                                                                              |                                                                                     |           |        |       |           |     |
|---------------|------------------------------------------------------------------------------|-------------------------------------------------------------------------------------|-----------|--------|-------|-----------|-----|
| Ciprofloxacin | C <sub>17</sub> H <sub>18</sub> FN <sub>3</sub> O <sub>3</sub>               | 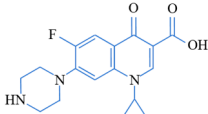   | 85721-33- | 331.34 | 0.28  | 5.56/8.77 | [1] |
|               |                                                                              |                                                                                     | 1         |        |       |           |     |
| Ofloxacin     | C <sub>18</sub> H <sub>20</sub> FN <sub>3</sub> O <sub>4</sub>               |    | 82419-36- | 361.38 | -0.39 | 5.35/6.72 | [1] |
|               |                                                                              |                                                                                     | 1-0       |        |       |           |     |
| Norfloxacin   | C <sub>16</sub> H <sub>18</sub> FN <sub>3</sub> O <sub>3</sub>               |    | 70458-96- | 319.33 | -1.03 | 5.58/8.77 | [1] |
|               |                                                                              |                                                                                     | 7         |        |       |           |     |
| Enrofloxacin  | C <sub>19</sub> H <sub>22</sub> FN <sub>3</sub> O <sub>3</sub>               |  | 93106-60- | 359.39 | 1.1   | 6.19/7.59 | [2] |
|               |                                                                              |                                                                                     | 6         |        |       |           |     |
| Lomefloxacin  | C <sub>17</sub> H <sub>19</sub> F <sub>2</sub> N <sub>3</sub> O <sub>3</sub> |  | 98079-51- | 351.35 | -0.3  | -         | [2] |
|               |                                                                              |                                                                                     | 7         |        |       |           |     |
| Danofloxacin  | C <sub>17</sub> H <sub>20</sub> FN <sub>3</sub> O <sub>3</sub>               |  | 112398-   | 357.38 | 0.44  | 5.65/6.73 | [1] |
|               |                                                                              |                                                                                     | 08-0      |        |       |           |     |
| Pefloxacin    | C <sub>17</sub> H <sub>20</sub> FN <sub>3</sub> O <sub>3</sub>               |  | 70458-92- | 333.36 | 0.27  | 5.55/7.01 | [1] |
|               |                                                                              |                                                                                     | 3         |        |       |           |     |

| Compound      | Molecular Formula                                                            | Chemical Structure                                                                  | CAS number  | Molecular Mass | Log Kow | pKa       | References |
|---------------|------------------------------------------------------------------------------|-------------------------------------------------------------------------------------|-------------|----------------|---------|-----------|------------|
| Fleroxacin    | C <sub>17</sub> H <sub>18</sub> F <sub>3</sub> N <sub>3</sub> O <sub>3</sub> | 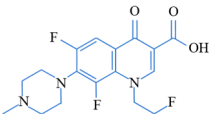   | 79660-72-3  | 369.34         | 0.24    | 5.44/6.06 | [1]        |
| Marbofloxacin | C <sub>17</sub> H <sub>19</sub> FN <sub>4</sub> O <sub>4</sub>               |    | 115550-35-1 | 362.35         | -2.92   | 5.38/6.16 | [1]        |
| Sarafloxacin  | C <sub>20</sub> H <sub>17</sub> F <sub>2</sub> N <sub>3</sub> O <sub>3</sub> |    | 98105-99-8  | 385.36         | 1.07    | 5.55/8.76 | [1]        |
| Enoxacin      | C <sub>15</sub> H <sub>17</sub> FN <sub>4</sub> O <sub>3</sub>               |  | 74011-58-8  | 320.32         | -0.20   | 5.50/8.59 | [3]        |
| Difloxacin    | C <sub>21</sub> H <sub>19</sub> F <sub>2</sub> N <sub>3</sub> O <sub>3</sub> |  | 98106-17-3  | 399.39         | 0.89    | -         | [4]        |
| Levofloxacin  | C <sub>18</sub> H <sub>20</sub> FN <sub>3</sub> O <sub>4</sub>               |  | 100986-85-4 | 361.37         | 0.51    | 5.7       | [5]        |

|              |                                                                |                                                                                   |           |        |      |      |     |
|--------------|----------------------------------------------------------------|-----------------------------------------------------------------------------------|-----------|--------|------|------|-----|
| Moxifloxacin | C <sub>21</sub> H <sub>24</sub> FN <sub>3</sub> O <sub>4</sub> | 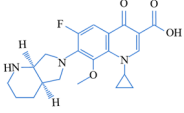 | 151096-   | 401.43 | 0.95 | -    | [4] |
|              |                                                                |                                                                                   | 09-2      |        |      |      |     |
| Flumequine   | C <sub>14</sub> H <sub>12</sub> FN <sub>3</sub> O <sub>3</sub> |  | 42835-25- | 261.25 | 1.60 | 6.50 | [3] |

6

| Antibiotics   | Country    | Place                 | Min<br>(ng/L) | Max<br>(ng/L) | Mean<br>(ng/L) | Med<br>(ng/L) | Frequency | References |
|---------------|------------|-----------------------|---------------|---------------|----------------|---------------|-----------|------------|
| Ciprofloxacin | USA        | Columbia River        |               |               | 0.021          |               |           | [5]        |
|               |            | Sacramento River      |               |               | 0.14           |               |           | [5]        |
|               |            | Surface water         |               |               | 116            |               |           | [6]        |
|               | Australia  |                       |               | 1300          |                | 70            | 30        | [6]        |
|               | Argentina  |                       |               |               | 102.04         |               |           | [7]        |
|               | Bangladesh | Aftabnagar Lake       | ND            | 88            | 30             |               | 67        | [8]        |
|               |            | Rampura Canal         | 455           | 1407          | 766            |               | 100       | [8]        |
|               |            | Trimohoni pump        | ND            | 16            | 0              |               | 67        | [8]        |
|               |            | Trimohoni River       | 466           | 754           | 624            |               | 100       | [8]        |
|               | Brazil     | Doce river watershed  | 171.93        | 3993.61       | 2277.61        |               |           | [9]        |
|               | China      | Beibu Gulf            | ND            | 2.76          | 0.57           | 0.46          | 71        | [10]       |
|               |            | Beijing               |               | 30.7          | <10            |               |           | [11]       |
|               |            | Beijing               | ND            | 12.8          |                | 3.5           | 63        | [12]       |
|               |            | Beiyangdian Lake      | 19.02         | 32.03         | 27.75          | 29.77         | 100       | [13]       |
|               |            | Bohai Estuarine water | 17            | 200           | 75             | 48            |           | [14]       |
|               |            | Bohai region          | 0.42          | 21.56         | 2.27           | 1.48          | 54.29     | [15]       |
|               |            | Bohai Sea             | ND            | 346           | 101            |               |           | [16]       |
|               |            | Bohai Seawater        | 5.2           | 85            | 38             | 42            |           | [14]       |
|               |            | Chaohu Lake           |               | 23.15         | <2.5           |               |           | [17]       |
|               |            | Chaohu Lake           | ND            | 21.35         | 3.47           | ND            | 16        | [18]       |
|               |            | Chaohu Lake           |               |               | 23.2           |               |           | [19]       |
|               |            | Changzhou             | 1.5           | 4.7           |                | 4             |           | [12]       |
|               |            | Dongting Lake         | ND            | 27.02         | 0.64           |               | 2.37      | [20]       |

## Continuation S2

| Antibiotics | Country | Place                     | Min<br>(ng/L) | Max<br>(ng/L) | Mean<br>(ng/L) | Med<br>(ng/L) | Frequency | References |
|-------------|---------|---------------------------|---------------|---------------|----------------|---------------|-----------|------------|
|             |         | Dongting Lake             | ND            | 134           | 29.9           |               | 70%       | [21]       |
|             |         | Eastern China             | 0.019         | 30            | 5.56           | 1.2           | 100%      | [22]       |
|             |         | Estuary                   |               | 2.28          |                |               |           | [23]       |
|             |         | Guangdong                 | ND            | 43.76         |                | 1.1           | 77.8%     | [24]       |
|             |         | Guangxi                   | 3             | <7            | <4             |               |           | [25]       |
|             |         | Guilin                    | 142.59        | 244.63        | 177.21         | 171.15        | 100%      | [26]       |
|             |         | Haikou                    | 0.12          | 0.63          |                |               |           | [27]       |
|             |         | Hanjiang River            | ND            | 4.4           |                |               |           | [19]       |
|             |         | Hetao Irrigation District | 0.83          | 161.47        | 14.42          |               | 100%      | [28]       |
|             |         | Hong Kong River           |               | 16.74         | 1.55           | 1.2           | 100%      | [29]       |
|             |         | Houguanxia Lake           |               |               | 6.3            |               |           | [30]       |
|             |         | Huangpu River             | ND            | 34.2          |                |               |           | [19]       |
|             |         | Jiangnan Plain            | 4.46          | 96            | 25.14          |               |           | [16]       |
|             |         | Laizhou Bay               |               |               | 66             |               |           | [31]       |
|             |         | Liaohe River Basin        | ND            | 5.02          | 0.17           |               | 3.45%     | [4]        |
|             |         | Mediterranean River       | 21.3          | 59.16         |                |               |           | [19]       |
|             |         | Nansi Lake                | ND            | 0.85          | 0.1            |               |           | [32]       |
|             |         | North China Plain         | ND            | 10.71         | 0.19           |               | 2.47%     | [33]       |
|             |         | Peal River                |               | 365           |                |               |           | [34]       |
|             |         | Peal River                | 4.24          | 49.9          | 9.94           |               | 100%      | [35]       |
|             |         | Shatian Lake              | 1.2           | 7.6           | 2.72           | 2.4           | 100%      | [36]       |
|             |         | Songhua River             |               | 80.54         |                |               |           | [34]       |
|             |         | Surface water             | 0.1           | 2850          | 153.5          | 26.7          |           | [37]       |

## Continuation S2

| Antibiotics | Country | Place                           | Min<br>(ng/L) | Max<br>(ng/L) | Mean<br>(ng/L) | Med<br>(ng/L) | Frequency | References |
|-------------|---------|---------------------------------|---------------|---------------|----------------|---------------|-----------|------------|
|             |         | Surface Water                   |               | 1729          |                | 11.44         |           | [38]       |
|             |         | Surface Water                   |               | 551.4         | 68.99          |               |           | [6]        |
|             |         | Surface Water                   | ND            | 450.2         | 145.13         | 134.2         | 83.33%    | [39]       |
|             |         | Surface water in<br>basins      | 0.1           | 230           | 57.96          | 15.3          |           | [37]       |
|             |         | Suzhou                          | ND            | 90.5          | 10.02          | 4.73          | 96.09%    | [40]       |
|             |         | Tianjin                         | 0.35          | 14.4          | 1.97           | 1.29          | 100%      | [41]       |
|             |         | Wangyang River                  | 238.3         | 551.4         |                |               |           | [42]       |
|             |         | WWPTs                           |               | <100          |                |               |           | [43]       |
|             |         | Xiaoqing River                  | ND            | 552.38        | 18.16          |               |           | [44]       |
|             |         | Xiaoqing River                  | ND            | 877           | 125            |               | 82.1%     | [45]       |
|             |         | Xiaoqing River<br>(Mainstream)  | LOQ           | 2715          | 95.7           |               | 59.7%     | [46]       |
|             |         | Xiaoqing River<br>(Tributaries) | LOQ           | 1857          | 83.7           |               | 56.9%     | [46]       |
|             |         | Xinjiang Uygur<br>Autonomous    | 2.1           | 3.35          | 2.72           |               | 100%      | [1]        |
|             |         | Xiong'an New Area               | ND            | 15.77         |                |               | 85%       | [3]        |
|             |         | Yang River                      |               | 1.20          |                |               |           | [23]       |
|             |         | Yangjie River                   | 0.77          | 4.32          |                |               |           | [19]       |
|             |         | Yangtze River                   | ND            | 0.94          | 0.34           |               |           | [16]       |
|             |         | Yangtze River                   |               | 283.5         |                |               |           | [34]       |
|             |         | Yangtze River                   | ND            | 46.68         | 8.1            |               |           | [47]       |
|             |         | Yangtze River                   | ND            | 0.94          | 0.34           |               | 67%       | [48]       |
|             |         | Yellow River                    |               |               | 37.73          |               |           | [34]       |
|             |         | Yellow River<br>(Mainstream)    | LOQ           | 1476          | 406            |               | 36.4%     | [46]       |
|             |         | Yellow River<br>(Tributaries)   | LOQ           | 4467          | 633            |               | 46%       | [46]       |
|             |         | Yellow River<br>(Henan)         | ND            | 10.1          | 3.03           |               | 66.67%    | [49]       |

Continuation S2



| Antibiotics | Country    | Place             | Min<br>(ng/L) | Max<br>(ng/L) | Mean<br>(ng/L) | Med<br>(ng/L) | Frequency | References |
|-------------|------------|-------------------|---------------|---------------|----------------|---------------|-----------|------------|
|             |            | Zhejiang          | 0.1           | <20           | <10            |               |           | [50]       |
|             | Costa Rica | Surface Water     | 160           | 1330          | 160            |               | 18%       | [42]       |
|             | Croatia    | Sava              | 0.39          | 5.38          | 2.04           | 1.24          | 100%      | [51]       |
|             | Cyprus     | Surface Water     | 252.3         | 316.8         | 284.55         |               |           | [52]       |
|             | Finland    | Surface Water     | 38.4          | 43.2          | 40.8           |               |           | [52]       |
|             |            | Surface Water     |               |               | 20             |               |           | [31]       |
|             | France     | Charmoise River   | 5             | 1523          | 288            |               |           | [16]       |
|             |            | Surface Water     |               | 1523          | 90.42          |               |           | [6]        |
|             |            | Surface Water     |               | 25            |                |               |           | [53]       |
|             | Germany    | Surface Water     | 43.8          | 230.6         | 137.2          |               |           | [52]       |
|             | Global     | Surface Water     | ND            | 542452        |                |               |           | [54]       |
|             | India      | Chennai city      | 10.5          | 186.1         | 31.95          |               | 100%      | [55]       |
|             |            | Ganges            | LOQ           | 26.8          | 7.7            | 5             | 63.3%     | [56]       |
|             | Iran       | Ekbatan           | 127           | 248           |                |               |           | [31]       |
|             |            | Firozaba River    |               |               | 656.8          |               |           | [19]       |
|             |            | Kan River         |               |               | 22.7           |               |           | [19, 31]   |
|             |            | Kan River         | 552.6         | 796.2         |                |               |           | [31]       |
|             | Ireland    | Surface Water     | 234           | 259.8         | 246.9          |               |           | [52]       |
|             | Italy      | Surface Water     |               |               | 7.7            |               |           | [57]       |
|             |            | Surface Water     |               | 16            | 8.8            |               |           | [6]        |
|             | Kenya      | Jujia drain       | 20300         | 75700         | 48700          | 52300         | 100%      | [58]       |
|             |            | Nzoia River Basin |               | 8.6           | 0.9            |               | 23.81%    | [59]       |
|             |            | Surface Water     | 12            | 510           |                |               |           | [19]       |
|             |            | Surface Water     | 500           | 2800          | 1775           |               | 100%      | [60]       |

Continuation S2

| Antibiotics | Country  | Place                | Min<br>(ng/L) | Max<br>(ng/L) | Mean<br>(ng/L) | Med<br>(ng/L) | Frequency | References |
|-------------|----------|----------------------|---------------|---------------|----------------|---------------|-----------|------------|
|             |          | Surface Water        | ND            | 1300          |                |               |           | [16]       |
|             | Korea    | Chungcheong Province |               | 0.52          |                |               |           | [53]       |
|             | Malaysia | Gombak River         | 225.18        | 299.88        | 267.2          |               |           | [61]       |
|             |          | Larut River          | LOQ           | 577.97        | 56.41          |               | 55.56%    | [62]       |
|             |          | Lui River            | 52.5          | 138.7         |                |               |           | [63]       |
|             | Norway   | Surface Water        | 159.2         | 159.2         | 159.2          |               |           | [52]       |
|             | Pakistan | Lahore               |               | 0.07          |                |               |           | [53]       |
|             | Peru     | Titicaca Lake        | 85.5          | 408.2         | 201            |               | 100%      | [64]       |
|             | Poland   | Surface Water        | 12            | 182           | 99.25          |               | 100%      | [65]       |
|             |          | Surface Water        |               | 277           | 24.83          |               |           | [6]        |
|             | Portugal | Leca River           | ND            | 339           |                |               |           | [16]       |
|             |          | Surface Water        |               | 88.7          |                | 88.7          | 1.82%     | [6]        |
|             |          | Tejo Estuary         | 1.56          | 7.14          |                |               |           | [19]       |
|             |          | Surface Water        |               |               | 88.7           |               |           | [57]       |
|             |          | Surface Water        | 231.4         | 584.9         | 424.53         |               |           | [52]       |
|             | Romania  | Cluj Napoca          |               | 77.53         |                |               |           | [53]       |
|             |          | Surface Water        |               |               | 15             |               |           | [57]       |
|             | Spain    | Baix Fluvià          |               |               | 211.8          |               |           | [31]       |
|             |          | Barcelona            |               | 443           |                |               |           | [53]       |
|             |          | Ebro delta           | 80            | 5875          | 2027.5         |               |           | [66]       |
|             |          | Mijares River        | ND            | 1105          |                |               |           | [67]       |
|             |          | NE Catalonia         |               | 77.2          |                |               |           | [53]       |
|             |          | Surface Water        |               | 740           | 30.99          |               |           | [6]        |
|             |          | Ter River            | 48.2          | 72.4          |                |               |           | [19]       |

Continuation S2

| Antibiotics | Country   | Place                   | Min<br>(ng/L) | Max<br>(ng/L) | Mean<br>(ng/L) | Med<br>(ng/L) | Frequency | References |
|-------------|-----------|-------------------------|---------------|---------------|----------------|---------------|-----------|------------|
|             | Sweden    | Surface Water           | 1             | 93.9          |                |               |           | [57]       |
|             |           | Surface Water           | 200.3         | 200.3         |                |               |           | [52]       |
|             |           | Surface Water           | LOQ           | 33.66         |                |               | 29%       | [68]       |
|             |           | Surface Water           |               |               | 17.78          |               |           | [57]       |
|             |           | Surface Water           | LOQ           | 560           | 48.64          | 5.05          |           | [69]       |
|             | Turkey    | Surface Water           |               | 13567         | 50.55          |               |           | [6]        |
|             | Uganda    | Victoria Lake           | 2             | 41            |                | 15            | 91%       | [70]       |
|             |           | Surface Water           | 29            | 88            |                |               |           | [71]       |
|             | Vietnam   | Hanoi                   | ND            | 990           |                | ND            | 13%       | [72]       |
|             |           |                         |               |               |                |               |           |            |
| Ofloxacin   | USA       | Surface Water           |               | 182           |                |               |           | [6]        |
|             | Argentina | Surface Water           |               |               | 34.14          |               |           | [7]        |
|             | China     | Beibu Gulf              | ND            | 0.46          | 0.07           | 0.02          | 58%       | [10]       |
|             |           | Beijing                 |               | 717.3         |                | 60.9          |           | [11]       |
|             |           | Beijing                 | 2             | 200.6         |                | 4.2           | 100%      | [12]       |
|             |           | Beiyangdian Lake        | 11            | 11.45         | 11.27          | 11.28         | 100%      | [13]       |
|             |           | Bohai Estuarine         | 3.2           | 30            | 9.3            | 9.2           |           | [14]       |
|             |           | Bohai region            | 0.21          | 43.63         | 1.36           | 0.38          | 3.97%     | [15]       |
|             |           | Bohai Sea (North China) | ND            | 45.4          | 9.9            |               |           | [16]       |
|             |           | Bohai Seawater          | 3             | 11            | 6.6            | 6.4           |           | [14]       |
|             |           | Changzhou               | 3.6           | 8.2           |                | 3.1           | 100%      | [12]       |
|             |           | Chaohu Lake             |               |               | 383.4          |               |           | [31]       |
|             |           | Chaohu Lake             | ND            | 50.6          |                |               |           | [19]       |
|             |           | Dianchi Lake            | ND            | 713.6         |                |               |           | [31]       |
|             |           | Dongting Lake           | 6.77          | 943.49        | 87.15          |               | 100%      | [20]       |

Continuation S2

| Antibiotics | Country | Place                     | Min<br>(ng/L) | Max<br>(ng/L) | Mean<br>(ng/L) | Med<br>(ng/L) | Frequency | References |
|-------------|---------|---------------------------|---------------|---------------|----------------|---------------|-----------|------------|
|             |         | Dongting Lake             | ND            | LOQ           | LOQ            |               | 20%       | [21]       |
|             |         | Estuary                   |               | 2.63          |                |               |           | [23]       |
|             |         | Fenhe River               | 18.21         | 283.34        | <106.74        |               |           | [73]       |
|             |         | Fuxian Lake               | 0.77          | 7.3           | 3.4            |               | 100%      | [74]       |
|             |         | Guangdong                 | 0.57          | 17.31         |                | 2.58          | 100%      | [24]       |
|             |         | Guangxi                   | 50            | <650          | <150           |               |           | [25]       |
|             |         | Guilin                    | ND            | 290.78        | 96.07          | ND            | 40%       | [26]       |
|             |         | Hanjiang River            | ND            | 9.5           |                |               |           | [19]       |
|             |         | Hetao Irrigation District | 0.82          | 253.51        | 12.92          |               | 100%      | [28]       |
|             |         | Hong Kong River           |               | 12.98         | 1.49           | 1.14          | 100%      | [29]       |
|             |         | Huangpu River             | ND            | 28.5          | 6.5            |               |           | [16]       |
|             |         | Huangpu River             | ND            | 28.5          |                |               |           | [19]       |
|             |         | Hubei Province            | 2.21          | 127.4         |                |               |           | [31]       |
|             |         | Jiangnan Plain            | ND            | 45.3          | 9.03           |               |           | [16]       |
|             |         | Jiaozhou Bay              |               |               | 16.7           |               |           | [75]       |
|             |         | Kaidu River and Boaten    | ND            | <5            |                |               | 80%       | [76]       |
|             |         | Laizhou Bay               | ND            | 6.2           |                |               |           | [19]       |
|             |         | Liaohe River Basin        | ND            | 27.21         | 3.68           |               | 27.59%    | [4]        |
|             |         | Liaohe River (Jilin)      |               |               | 67.1           |               |           | [31]       |
|             |         | Main River                | ND            | 4.3           |                |               |           | [19]       |
|             |         | Nansi Lake                | ND            | 50            | 3.13           |               | 85.33%    | [32]       |
|             |         | Pearl River               | 0.6           | 60.3          | 8.52           |               | 100%      | [35]       |
|             |         | Pearl River               |               |               | 6.93           |               |           | [31]       |
|             |         | Pearl River               | 53            | 108           |                |               |           | [19]       |

Continuation S2

| Antibiotics | Country | Place                        | Min<br>(ng/L) | Max<br>(ng/L) | Mean<br>(ng/L) | Med<br>(ng/L) | Frequency | References |
|-------------|---------|------------------------------|---------------|---------------|----------------|---------------|-----------|------------|
|             |         | Shatian Lake                 | 0.1           | 0.6           | 0.25           | 0.2           | 100%      | [36]       |
|             |         | Songhua River                |               | 14.1          |                |               |           | [34]       |
|             |         | Surface Water                | 0.1           | 5100          | 134.8          | 15.2          |           | [37]       |
|             |         | Surface Water                |               | 127400        |                | 11.02         |           | [38]       |
|             |         | Surface Water                |               | 11734.6       |                |               |           | [6]        |
|             |         | Surface Water                | ND            | 5.98          | 3.18           | 2.62          | 71.4%     | [77]       |
|             |         | Surface Water in Basins      | ND            | 118.1         | 22.67          | 6.4           |           | [37]       |
|             |         | Suzhou                       | ND            | 195           | 10.18          | 3.47          | 99.22%    | [40]       |
|             |         | Taihu Lake                   | <1            | <1            | <1             |               |           | [78]       |
|             |         | Taihu Lake                   | 7.45          | 17.01         |                |               |           | [31]       |
|             |         | Tianjin                      | LOQ           | 44.4          | 3.3            | 1.44          | 100%      | [41]       |
|             |         | Wanfeng Lake                 |               | 246.96        | 169.48         | 149.58        | 100%      | [79]       |
|             |         | Wangyang River               | 668.3         | 11734.6       |                |               |           | [80]       |
|             |         | Wuhan City WWTPs             | LOQ           | 4.4           | 1.45           |               | 66.67%    | [30]       |
|             |         | Xiaoqing River               | ND            | <7500         |                |               |           | [43]       |
|             |         | Xiaoqing River               | ND            | 6374.45       | 241.39         |               |           | [44]       |
|             |         | Xiaoqing River               | 0.5           | 240           | 38.2           |               | 100%      | [45]       |
|             |         | Xiaoqing River (Mainstream)  | 4.48          | 368           | 64.9           |               | 67.7%     | [46]       |
|             |         | Xiaoqing River (Tributaries) | 3.6           | 1371          | 54.1           |               | 60%       | [46]       |
|             |         | Xinjiang Uygur Autonomous    | 0.75          | 3.55          | 1.39           | 1.17          | 100%      | [1]        |
|             |         | Xiong'an New Area            | ND            | 76.25         |                |               | 69%       | [3]        |
|             |         | Yang River                   |               | 12.95         |                |               |           | [23]       |
|             |         | Yangtze River                | ND            | 0.82          | 0.32           |               | 75%       | [48]       |
|             |         | Yangtze River                | ND            | 48.92         | 7.89           |               |           | [47]       |

Continuation S2

| Antibiotics | Country    | Place                         | Min<br>(ng/L) | Max<br>(ng/L) | Mean<br>(ng/L) | Med<br>(ng/L) | Frequency | References |
|-------------|------------|-------------------------------|---------------|---------------|----------------|---------------|-----------|------------|
|             |            | Yangtze River                 |               | 30.6          |                |               |           | [34]       |
|             |            | Yangtze River                 | ND            | 0.82          | 0.32           |               |           | [16]       |
|             |            | Yangtze River<br>(Nanjing)    | ND            | 34.66         | 3.27           |               |           | [81]       |
|             |            | Yanjie River                  | 0.14          | 4.49          |                |               |           | [80]       |
|             |            | Yellow River                  |               |               | 119            |               |           | [31]       |
|             |            | Yellow River<br>(Mainstream)  | 3.2           | 329           | 10.9           |               | 54.5%     | [46]       |
|             |            | Yellow River<br>(Tributaries) | LOQ           | 491           | 11.4           |               | 57.1%     | [46]       |
|             |            | Yellow River<br>(Henan)       | ND            | 511           | 11.65          |               | 72%       | [49]       |
|             |            | Zhejiang                      | 0.1           | 97.5          | <3             |               |           | [50]       |
|             |            | Zhuhai                        |               |               | 114.9          |               |           | [82]       |
|             | Costa Rica | Surface Water                 | 90            | 1250          | 670            |               | 7%        | [42]       |
|             | Cyprus     | Surface Water                 | 196.7         | 305.1         | 250.9          |               |           | [52]       |
|             | Finland    | Surface Water                 | 20            | 22.8          | 21.4           |               |           | [52]       |
|             | France     | Charmoise River               | 100           | 2888          | 1209           |               |           | [16]       |
|             |            | Surface Water                 |               | 19.7          |                |               |           | [53]       |
|             |            | Surface Water                 |               | 2888          | 113.52         |               |           | [6]        |
|             | Germany    | Surface Water                 | ND            | 66.5          | 33.25          |               |           | [52]       |
|             | Global     | Surface Water                 | ND            | 6840          |                |               |           | [54]       |
|             | India      | Chennai City                  | 0.8           | 222.8         | 80.38          |               | 100%      | [55]       |
|             |            | Ganges                        | LOQ           | 1.4           | 1              | 1.1           | 11.1%     | [56]       |
|             |            | Kshipra River                 | 640           | 1460          | 985.71         |               |           | [83]       |
|             |            | Surface Water                 |               | 11000         | 4284.55        |               |           | [6]        |
|             | Ireland    | Surface Water                 | 39.9          | 65.4          | 52.65          |               |           | [52]       |

Continuation S2

| Antibiotics | Country       | Place                | Min<br>(ng/L) | Max<br>(ng/L) | Mean<br>(ng/L) | Med<br>(ng/L) | Frequency | References |
|-------------|---------------|----------------------|---------------|---------------|----------------|---------------|-----------|------------|
|             | Italy         | Surface Water        |               | 18.06         | 10.09          |               |           | [6]        |
|             | Korea         | Chungcheong Province |               | 0.70          |                |               |           | [53]       |
|             | Malaysia      | Larut River          | LOQ           | 253.09        | 21.47          |               | 33.33%    | [62]       |
|             | Norway        | Surface Water        | 27.1          | 27.1          | 27.1           |               |           | [52]       |
|             | Poland        | Bialka River         | 0.73          | 13.71         | 3.47           | 2.16          |           | [84]       |
|             |               | Surface Water        |               | 89            | 8.83           |               |           | [6]        |
|             |               | River                | 4             | 32            | 18.85          |               | 100%      | [65]       |
|             | Portugal      | Leca River           | ND            | 120           |                |               |           | [16]       |
|             |               | Surface Water        | 89.7          | 184.9         | 135.8          |               |           | [52]       |
|             | Spain         | Barcelona            |               | 79.5          |                |               |           | [53]       |
|             |               | Ebro Delta           | 137           | 1161          | 535            |               |           | [66]       |
|             |               | Ebro River           | ND            | 78.6          |                |               |           | [80]       |
|             |               | NE Catalonia         |               | 18.2          |                |               |           | [53]       |
|             |               | Surface Water        |               | 8770          | 210.74         |               |           | [6]        |
|             |               | Surface Water        | 142.3         | 142.3         | 142.3          |               |           | [52]       |
|             |               | Ter River            | 100.7         | 137.6         |                |               |           | [80]       |
|             |               | Tributaries          | ND            | 79.9          |                |               |           | [80]       |
|             |               | Valencia Region      | 1547          | 4778          |                |               |           | [80]       |
|             | Sweden        | Surface Water        | LOQ           | 37.5          | 2.75           |               |           | [69]       |
|             | United States | Surface Water        |               | 13.53         |                |               |           | [53]       |
|             | Vietnam       | Hanoi                | ND            | 630           |                | ND            | 38%       | [72]       |
| Norfloxacin | USA           | Chesapeake Bay       | 59.2          | 94.1          |                |               |           | [80]       |
|             | Brazil        | Surface Water        |               | 285           |                |               | 42%       | [85]       |
|             | China         | Beibu Gulf           | 0.43          | 6.17          | 2.1            | 1.83          | 100%      | [10]       |

Continuation S2

| Antibiotics | Country | Place                     | Min<br>(ng/L) | Max<br>(ng/L) | Mean<br>(ng/L) | Med<br>(ng/L) | Frequency | References |
|-------------|---------|---------------------------|---------------|---------------|----------------|---------------|-----------|------------|
|             |         | Beijing                   |               | 290.2         | <50            |               |           | [11]       |
|             |         | Beijing                   | ND            | 47            |                | 28.5          | 88%       | [12]       |
|             |         | Beiyangdian Lake          | 16.9          | 22.95         | 19.14          | 18.4          | 100%      | [13]       |
|             |         | Bohai Estuarine           | 40            | 230           | 146            | 137           |           | [14]       |
|             |         | Bohai Region              | 0.33          | 25.52         | 1.65           | 0.92          | 68.57%    | [15]       |
|             |         | Bohai (North China)       | ND            | 572           | 118            |               |           | [16]       |
|             |         | Bohai Seawater            | 8.4           | 134           | 57             | 59            |           | [14]       |
|             |         | Chaohu Lake               |               | 24.18         | <5             |               |           | [17]       |
|             |         | Changzhou                 | 63.8          | 70.9          |                | 69.3          | 100%      | [12]       |
|             |         | Chaohu Lake               | ND            | 19.11         | 1.59           | ND            | 8%        | [18]       |
|             |         | Chaohu Lake               | ND            | 70.2          |                |               |           | [80]       |
|             |         | Dongting Lake             | ND            | 6.22          | 4.52           |               | 40%       | [21]       |
|             |         | Dongting Lake             | ND            | 12.17         | 0.29           |               | 2.37%     | [20]       |
|             |         | Eastern China             | 0.07          | 53            | 8.93           | 0.75          | 100%      | [22]       |
|             |         | Guangdong                 | 1.77          | 53.81         |                | 4.65          | 88.9%     | [24]       |
|             |         | Guangxi                   | 3             | <7            | <4             |               |           | [25]       |
|             |         | Guilin                    | ND            | 187.56        | 110.17         | 177.61        | 60%       | [26]       |
|             |         | Hangzhou                  | 7             | 12.9          |                |               |           | [27]       |
|             |         | Hanjiang River            | ND            | 6.4           |                |               |           | [80]       |
|             |         | Hetao Irrigation District | 6.51          | 220.91        | 43.71          |               | 100%      | [28]       |
|             |         | Hong Kong River           |               | 7.38          | 1.13           | 0.97          | 100%      | [29]       |
|             |         | Huangpu River             | ND            | 0.2           |                |               |           | [80]       |
|             |         | Jiangnan Plain            | 9.57          | 277           | 65.87          |               |           | [16]       |
|             |         | Laizhou Bay               | 7.5           | 103           |                |               |           | [80]       |

Continuation S2



| Antibiotics | Country | Place                        | Min<br>(ng/L) | Max<br>(ng/L) | Mean<br>(ng/L) | Med<br>(ng/L) | Frequency | References |
|-------------|---------|------------------------------|---------------|---------------|----------------|---------------|-----------|------------|
|             |         | Liaohe River                 | ND            | 13.65         | 0.65           |               | 6.9%      | [4]        |
|             |         | Nanjing                      | 146.72        | 290.2         |                |               |           | [31]       |
|             |         | Nansi Lake                   | ND            | 1             | 0.24           |               | 52.33%    | [32]       |
|             |         | North China                  | ND            | 7.92          | 1.96           |               | 51.85%    | [33]       |
|             |         | Pearl River                  |               |               | 68.06          |               |           | [31]       |
|             |         | Pearl River                  | 5.49          | 27.2          | 10.33          |               | 100%      | [35]       |
|             |         | Shatian Lake                 | 1.2           | 7.4           | 2.71           | 2.2           | 100%      | [36]       |
|             |         | Songhua River                |               | 268.86        |                |               |           | [34]       |
|             |         | Surface Water                |               | 6800          |                | 10.36         |           | [38]       |
|             |         | Surface Water                | 0.1           | 6800          | 192.8          | 37.1          |           | [37]       |
|             |         | Surface Water in Basins      | 1.8           | 64.4          | 29.64          | 22.9          |           | [37]       |
|             |         | Suzhou                       | 1.17          | 556           | 100.5          | 57.59         | 100%      | [40]       |
|             |         | Taihu Lake                   | 15.83         | 56.22         |                |               |           | [31]       |
|             |         | Taihu Lake                   | <1            | <1            | <1             |               |           | [78]       |
|             |         | Tianjin                      | 1.42          | 16.6          | 5.76           | 5.1           | 100%      | [41]       |
|             |         | Wangyang River               | 199.4         | 617.1         |                |               |           | [80]       |
|             |         | WWTPs                        |               | <2500         |                |               |           | [43]       |
|             |         | Xiaoqing River               | ND            | 888.07        | 31             |               |           | [44]       |
|             |         | Xiaoqing River (Mainstream)  | LOQ           | 2477          | 13.9           |               | 35.5%     | [46]       |
|             |         | Xiaoqing River (Tributaries) | LOQ           | 9173          | 11.1           |               | 33.8%     | [46]       |
|             |         | Xinjiang Uygur Autonomous    | 2.91          | 9.85          | 4.81           | 4.33          | 100%      | [1]        |
|             |         | Xiong'an New Area            | ND            | 30.66         |                |               | 67%       | [3]        |
|             |         | Yangtze River                | 0.11          | 2.37          |                |               |           | [80]       |
|             |         | Yangtze River                | ND            | 0.83          | 0.32           |               | 67%       | [48]       |

Continuation S2

| Antibiotics | Country | Place                         | Min<br>(ng/L) | Max<br>(ng/L) | Mean<br>(ng/L) | Med<br>(ng/L) | Frequency | References |
|-------------|---------|-------------------------------|---------------|---------------|----------------|---------------|-----------|------------|
|             |         | Yangtze River                 |               | 278.2         |                |               |           | [34]       |
|             |         | Yangtze River<br>(Nanjing)    | 146.72        | 290.2         | 180.93         |               | 100%      | [81]       |
|             |         | Yellow River                  |               |               | 26.03          |               |           | [34]       |
|             |         | Yellow River                  | 6.14          | 382.3         | 43.47          | 23.84         | 100%      | [2]        |
|             |         | Yellow River                  |               |               | 327            |               |           | [31]       |
|             |         | Yellow River<br>(Tributaries) | LOQ           | 10088         | 524            |               | 33.3%     | [46]       |
|             |         | Yellow River<br>(Henan)       | ND            | 3450          | 86.13          |               | 96%       | [49]       |
|             |         | Zhejiang                      | 0.1           | <10           | <2             |               |           | [50]       |
| France      |         | Charmoise River               | 14            | 1261          | 289            |               |           | [16]       |
|             |         | Seine River                   |               |               | 163            |               |           | [31]       |
| Global      |         | Surface Water                 | ND            | 251137        |                |               |           | [54]       |
| India       |         | Chennai City                  | 0.5           | 20.9          | 4.33           |               | 88%       | [55]       |
|             |         | Kshipra River                 | 640           | 980           | 752.86         |               |           | [83]       |
| Kenya       |         | Juja Drain                    | 10500         | 52600         | 37500          | 41400         | 93%       | [58]       |
|             |         | Surface Water                 | 600           | 4900          | 2325           |               | 100%      | [60]       |
|             |         | Surface Water                 | ND            | 2200          |                |               |           | [16]       |
| Korea       |         | Chungcheong<br>Province       |               | 1.27          |                |               |           | [53]       |
| Malaysia    |         | Larut River                   | LOQ           | 2.55          | 0.37           |               | 33.33%    | [62]       |
| Poland      |         | River                         | LOQ           | 95            | 23.75          |               | 25%       | [65]       |
| Romania     |         | Cluj Napoca                   |               | 8.15          |                |               |           | [53]       |
| Spain       |         | Barcelona                     |               | 123           |                |               |           | [53]       |
|             |         | Ebro Delta                    | 25            | 497           | 236            |               |           | [66]       |
|             |         | Mijares River                 | ND            | 940           |                |               |           | [67]       |
|             |         | NE Catalonia                  |               | 30.3          |                |               |           | [53]       |

Continuation S2

| Antibiotics  | Country     | Place                   | Min<br>(ng/L) | Max<br>(ng/L) | Mean<br>(ng/L) | Med<br>(ng/L) | Frequency | References |
|--------------|-------------|-------------------------|---------------|---------------|----------------|---------------|-----------|------------|
|              | Switzerland | Surface Water           | LOQ           | 3.2           |                |               | 4%        | [68]       |
|              |             | Karst System            |               | 2             |                |               |           | [53]       |
|              | Tunisia     | Mediterranean Sea       | ND            | 20700         |                |               |           | [80]       |
|              | Uganda      | Victoria Lake           | 1.9           | 26            |                | 14            | 99%       | [70]       |
| Enrofloxacin | USA         | Chesapeake Bay          | 8             | 17            |                |               |           | [80]       |
|              | Asia        |                         | ND            | 30000         | 14.6           |               |           | [86]       |
|              | Brazil      | Doce River              | 73.2          | 566           | 351.27         |               |           | [9]        |
|              |             | Watershed               |               |               |                |               |           |            |
|              | China       | Surface Water           |               | 71            |                |               | 50%       | [85]       |
|              |             | Beibu Gulf              | ND            | 1.1           | 0.25           | 0.19          | 87%       | [10]       |
|              |             | Beijing                 | 4.8           | 29.9          |                | 18.3          | 100%      | [12]       |
|              |             | Bohai Estuarine         | 3.9           | 27            | 11             | 9             |           | [14]       |
|              |             | Bohai Region            | 0.21          | 16.79         | 1              | 0.61          | 69.29%    | [15]       |
|              |             | Bohai Sea (North China) | ND            | 24.6          | 10.6           |               |           | [16]       |
|              |             | Bohai Seawater          | 3             | 11            | 6.2            | 6.1           |           | [14]       |
|              |             | Chaohu Lake             |               | 25.16         | <6             |               |           | [17]       |
|              |             | Chaohu Lake             | ND            | 4.7           |                |               |           | [80]       |
|              |             | Changzhou               | 20.2          | 26.8          |                | 22.8          | 100%      | [12]       |
|              |             | Dongting Lake           | ND            | 4.82          | 3.61           |               | 23.5%     | [21]       |
|              |             | Dongting Lake           | ND            | 63.75         | 2.7            |               | 16.67%    | [20]       |
|              |             | Eastern China           | 0.02          | 24.1          | 3.59           | 0.65          | 100%      | [22]       |
|              |             | Estuary                 |               | 0.14          |                |               |           | [23]       |
|              |             | Guangdong               | 0.93          | 9.1           |                | 1.25          | 100%      | [24]       |
|              |             | Guangxi                 | 3             | <7            | <4             |               |           | [25]       |
|              |             | Guilin                  | 184.71        | 673.13        | 342.66         | 248.27        | 100%      | [26]       |

Continuation S2

| Antibiotics | Country | Place                        | Min<br>(ng/L) | Max<br>(ng/L) | Mean<br>(ng/L) | Med<br>(ng/L) | Frequency | References |
|-------------|---------|------------------------------|---------------|---------------|----------------|---------------|-----------|------------|
|             |         | Hangzhou                     | 10.5          | 18.7          |                |               |           | [27]       |
|             |         | Hanjiang River               | ND            | 3.6           |                |               |           | [80]       |
|             |         | Hetao Irrigation District    | 0.81          | 14.24         | 4.64           |               | 100%      | [28]       |
|             |         | Hong Kong River              |               | 3.85          | 0.54           | 0.49          | 1005      | [29]       |
|             |         | Honghu Lake                  |               | <5            |                |               |           | [87]       |
|             |         | Huangpu River                | ND            | 14.6          | 2.8            |               |           | [16]       |
|             |         | Jiangnan Plain               | ND            | 136           | 35.56          |               |           | [16]       |
|             |         | Laizhou Bay                  | ND            | 7.6           |                |               |           | [80]       |
|             |         | Laizhou Bay                  |               |               | 209            |               |           | [31]       |
|             |         | Liaohe River Basin           | ND            | 5.47          | 0.35           |               | 13.79%    | [4]        |
|             |         | Mediterranean River          | 2.87          | 154.34        |                |               |           | [80]       |
|             |         | Nansi Lake                   | ND            | 0.94          | 0.21           |               | 53.33%    | [32]       |
|             |         | North China                  | ND            | 33.29         | 1.43           |               | 45.68%    | [33]       |
|             |         | Shatian Lake                 | 1.1           | 15            | 6.05           | 4.9           | 100%      | [36]       |
|             |         | Songhua River                |               | 16.4          |                |               |           | [34]       |
|             |         | Surface Water                |               | 5681.9        |                | 9.18          |           | [38]       |
|             |         | Surface Water                | ND            | 900           | 36.8           | 6.6           |           | [37]       |
|             |         | Surface Water in Basins      | 1.4           | 59.7          | 16.63          | 8.2           |           | [37]       |
|             |         | Suzhou                       | 0.68          | 67.3          | 14.76          | 11.19         | 100%      | [40]       |
|             |         | Taihu Lake                   | <1            | <1            | <1             |               |           | [78]       |
|             |         | Wangyang River               | 242.6         | 978.8         |                |               |           | [80]       |
|             |         | Xiaoqing River               | ND            | 146.51        | 3.63           |               |           | [44]       |
|             |         | Xiaoqing River (Mainstream)  | LOQ           | 11890         | 72.1           |               | 72.1%     | [46]       |
|             |         | Xiaoqing River (Tributaries) | LOQ           | 15375         | 75.4           |               | 60%       | [46]       |

Continuation S2

| Antibiotics  | Country      | Place                      | Min<br>(ng/L) | Max<br>(ng/L) | Mean<br>(ng/L) | Med<br>(ng/L) | Frequency | References |
|--------------|--------------|----------------------------|---------------|---------------|----------------|---------------|-----------|------------|
|              |              | Xiong'an New Area          | ND            | 2.82          |                |               | 51%       | [3]        |
|              |              | Yang River                 |               | 0.61          |                |               |           | [23]       |
|              |              | Yangjie River              | 0.53          | 5.56          |                |               |           | [80]       |
|              |              | Yangtze River              | ND            | 0.89          | 0.4            |               | 83%       | [48]       |
|              |              | Yangtze River (Nanjing)    | 3             | 26.24         | 11.92          |               | 100%      | [81]       |
|              |              | Yellow River               | 8.83          | 206.7         | 27.35          | 18.63         | 100%      | [2]        |
|              |              | Yellow River (Mainstream)  | LOQ           | 13462         | 74.7           |               | 63.6%     | [46]       |
|              |              | Yellow River (Tributaries) | LOQ           | 11900         | 297            |               | 63.5%     | [46]       |
|              | Croatia      | Sava                       | 4.64          | 80.14         | 21.04          | 6.50          | 100%      | [51]       |
|              | France       | Surface Water              |               | 9             |                |               |           | [53]       |
|              | Global       | Surface Water              | ND            | 181609        |                |               |           | [54]       |
|              | India        | Chennai City               | 0.5           | 4.9           | 1.53           |               | 96%       | [55]       |
|              | Korea        | Chungcheong Province       |               | 0.19          |                |               |           | [53]       |
|              | Malaysia     | Larut River                | LOQ           | 34.3          | 3.63           |               | 44.44%    | [62]       |
|              | Peru         | Titicaca Lake              | 56.2          | 63            | 60.7           |               | 100%      | [64]       |
|              | South Africa | Apies River                |               |               | 3.12           |               |           | [88]       |
|              | Spain        | Barcelona                  |               | 264           |                |               |           | [53]       |
|              |              | NE Catalonia               |               | 60.1          |                |               |           | [53]       |
|              |              | Surface Water              | 69.4          | 69.4          | 69.4           |               |           | [52]       |
|              |              | Surface Water              | 11.8          | 970           |                |               | 89%       | [68]       |
|              | Tunisia      | Mediterranean Sea          | 4800          | 40200         |                |               |           | [80]       |
| Lomefloxacin | China        | Beijing                    | 1.1           | 10.9          |                | 5.2           | 100%      | [12]       |
|              |              | Bohai Region               | 0.21          | 0.44          | 0.26           | 0.25          | 14.29%    | [15]       |
|              |              | Dongting Lake              | ND            | 3075          | 388            |               | 26.5%     | [21]       |

Continuation S2

| Antibiotics  | Country   | Place                        | Min<br>(ng/L) | Max<br>(ng/L) | Mean<br>(ng/L) | Med<br>(ng/L) | Frequency | References |
|--------------|-----------|------------------------------|---------------|---------------|----------------|---------------|-----------|------------|
|              |           | Estuary                      |               | 1             |                |               |           | [23]       |
|              |           | Guangdong                    | 0.85          | 2.61          |                | 0.89          | 100%      | [24]       |
|              |           | Hetao Irrigation District    | LOQ           | 1.37          | 0.18           |               | 56.5%     | [28]       |
|              |           | Hong Kong River              |               | 1.77          | 0.62           | 0.43          | 100%      | [29]       |
|              |           | Jiangnan Plain               | ND            | 36.4          | 9.98           |               |           | [16]       |
|              |           | Liaohe River Basin           | ND            | 14.61         | 1.15           |               | 20.69%    | [4]        |
|              |           | Surface Water                |               | 1170.4        |                | 5.63          |           | [38]       |
|              |           | Surface Water                | ND            | 1735.4        | 37.3           | 3.8           |           | [37]       |
|              |           | Surface Water in Basins      | ND            | 5.8           | 1.29           | ND            |           | [37]       |
|              |           | Xiaoqing River (Mainstream)  | LOQ           | 214           | 89.1           |               | 41.9%     | [46]       |
|              |           | Xiaoqing River (Tributaries) | LOQ           | 233           | 76.3           |               | 43.1%     | [46]       |
|              |           | Yang River                   |               | 2.37          |                |               |           | [23]       |
|              |           | Yellow River                 | ND            | 1.94          | 0.29           | 0.2           | 88%       | [2]        |
|              |           | Yellow River (Mainstream)    | LOQ           | 181           | 91.4           |               | 51.5%     | [46]       |
|              |           | Yellow River (Tributaries)   | LOQ           | 212           | 71.8           |               | 47.6%     | [46]       |
|              | France    | Charmoise River              | 3.6           | 6.7           | 5.5            |               |           | [16]       |
| Danofloxacin | USA       | Alamance County              | 8.31          | 299.62        | 122.83         |               |           | [89]       |
|              |           | North Carolina               | ND            | 1227          |                | 5.1           | 67%       | [90]       |
|              | Brazilian | Surface Water                |               | 272           |                |               | 33%       | [85]       |
|              | China     | Guangdong                    | 1.6           | 189.53        |                | 1.97          | 100%      | [24]       |
|              |           | Liaohe River Basins          | ND            | 32.38         | 2.36           |               | 27.59%    | [4]        |
|              |           | Surface Water                |               | 603.29        |                | 62.83         |           | [38]       |
|              |           | Xiaoqing River (Mainstream)  | LOQ           | 4111          | 50.6           |               | 48.4%     | [46]       |
|              |           | Xiaoqing River (Tributaries) | LOQ           | 231           | 61.5           |               | 46.2%     | [46]       |

Continuation S2

| Antibiotics   | Country | Place                      | Min<br>(ng/L) | Max<br>(ng/L) | Mean<br>(ng/L) | Med<br>(ng/L) | Frequency | References |      |
|---------------|---------|----------------------------|---------------|---------------|----------------|---------------|-----------|------------|------|
|               |         | Xinjinag<br>Autonomous     | Uygur         | 0.92          | 4.82           | 2.39          | 2         | 100%       | [1]  |
|               |         | Xiong'an New Area          |               | ND            | 2.91           |               |           | 41%        | [3]  |
|               |         | Yellow<br>(Tributaries)    | River         | LOQ           | 496            | 61.3          |           | 41.3%      | [46] |
|               |         |                            |               |               |                |               |           |            |      |
| Pefloxacin    | China   | Guangdong                  |               | 2.04          | 3.53           |               | 2.66      | 88.9%      | [24] |
|               |         | Hong Kong River            |               |               | 1.51           | 0.56          | 0.52      | 100%       | [29] |
|               |         | Surface Water              |               |               | 323            |               | 22.56     |            | [38] |
|               |         | Xiaoqing<br>(Mainstream)   | River         | 7.6           | 4154           | 903           |           | 72.6%      | [46] |
|               |         | Xiaoqing<br>(Tributaries)  | River         | 5.3           | 4870           | 886           |           | 69.2%      | [46] |
|               |         | Xinjiang<br>Autonomous     | Uygur         | 2.34          | 17.6           | 8.97          | 6.3       | 100%       | [1]  |
|               |         | Yangtze<br>(Nanjing)       | River         | ND            | 5.42           | 0.27          |           |            | [81] |
|               |         | Yellow<br>(Mainstream)     | River         | 171           | 3144           | 563           |           | 63.6%      | [46] |
|               |         | Yellow<br>(Tributaries)    | River         | 5.8           | 4467           | 633           |           | 66.7%      | [46] |
|               |         |                            |               |               |                |               |           |            |      |
| Fleroxacin    | China   | Dongting Lake              |               | ND            | 8.88           | 4.79          |           | 46.5%      | [21] |
|               |         | Guangdong                  |               | 0.89          | 1.43           |               | 0.94      | 100%       | [24] |
|               |         | Hong Kong River            |               |               | 1.07           | 0.51          | 0.52      | 100%       | [29] |
|               |         | Liaohe River Basins        |               | ND            | 3.51           | 0.64          |           | 20.69%     | [4]  |
|               |         | Shatian Lake               |               | 0.4           | 0.6            | 0.45          | 0.4       | 100%       | [36] |
|               |         | Surface Water              |               |               | 252            |               | 3.3       |            | [38] |
|               |         | Surface Water              |               | ND            | 309.4          | 32.2          | 7.3       |            | [37] |
|               |         | Surface Water in<br>Basins |               | ND            | 16.7           | 3.5           | ND        |            | [37] |
|               |         | Xinjiang<br>Autonomous     | Uygur         | 1.1           | 17.15          | 3.77          | 2.2       | 100%       | [1]  |
|               |         | Xiong'an New Area          |               | ND            | 1.55           |               |           | 36%        | [3]  |
| Marbofloxacin | China   | Dongting Lake              |               | ND            | 1.01           | 0.91          |           | 30%        | [21] |
|               |         | Guangdong                  |               | 0.18          | 5.31           |               | 0.25      | 100%       | [24] |

Continuation S2

| Antibiotics  | Country   | Place                        | Min<br>(ng/L) | Max<br>(ng/L) | Mean<br>(ng/L) | Med<br>(ng/L) | Frequency | References |
|--------------|-----------|------------------------------|---------------|---------------|----------------|---------------|-----------|------------|
|              |           | Hong Kong River              |               | 0.59          | 0.24           | 0.25          | 92.31%    | [29]       |
|              |           | Liaohe River Basins          | ND            | 40.49         | 5.07           |               | 24.14%    | [4]        |
|              |           | Surface Water                |               | 16.7          |                | 0.9           |           | [38]       |
|              |           | Xinjiang Uygur Autonomous    | 0.85          | 14.85         | 2.92           | 1.53          | 100%      | [1]        |
|              | Croatia   | Sava                         | 0.54          | 24.53         | 5.75           | 1.16          | 100%      | [51]       |
| Sarafloxacin | China     | Dongting Lake                | ND            | 7.94          | 5.51           |               | 23.5%     | [21]       |
|              |           | Estuary                      |               | 0.11          |                |               |           | [23]       |
|              |           | Guangdong                    | ND            | 18.2          |                | 2.7           | 33.3%     | [24]       |
|              |           | Hong Kong River              |               | 1.56          | 0.85           | 0.81          | 100%      | [29]       |
|              |           | Liaohe River Basins          | ND            | 6.02          | 0.36           |               | 6.9%      | [4]        |
|              |           | Shatian Lake                 | ND            | 32            | 12.85          | 9             | 94.12%    | [36]       |
|              |           | Surface Water                |               | 80.04         |                | 1.3           |           | [38]       |
|              |           | Xiaoqing River (Mainstream)  | LOQ           | 1892          | 16.5           |               | 71%       | [46]       |
|              |           | Xiaoqing River (Tributaries) | LOQ           | 2290          | 17.8           |               | 60%       | [46]       |
|              |           | Xinjiang Uygur Autonomous    | 0.36          | 2.35          | 0.98           | 0.78          | 100%      | [1]        |
|              |           | Xiong'an New Area            | ND            | 7.05          |                |               | 41%       | [3]        |
|              |           | Yang River                   |               | 0.67          |                |               |           | [23]       |
|              |           | Yellow River (Mainstream)    | LOQ           | 1899          | 17.7           |               | 72.7%     | [46]       |
|              |           | Yellow River (Tributaries)   | LOQ           | 1528          | 20.3           |               | 73%       | [46]       |
|              | Croatia   | Sava                         | 0.49          | 2.79          | 1.05           | 0.70          | 100%      | [51]       |
|              | Peru      | Titicaca Lake                | 72.7          | 76.5          | 74.2           |               | 100%      | [64]       |
| Enoxacin     | Brazilian | Surface Water                | ND            | 386           |                |               | 5%        | [85]       |
|              | China     | Beibu Gulf                   | ND            | 2.95          | 1.24           | 0.85          | 94%       | [10]       |
|              |           | Bohai Sea                    | ND            | 508           | 116            |               |           | [16]       |

Continuation S2



| Antibiotics  | Country  | Place                        | Min<br>(ng/L) | Max<br>(ng/L) | Mean<br>(ng/L) | Med<br>(ng/L) | Frequency | References |
|--------------|----------|------------------------------|---------------|---------------|----------------|---------------|-----------|------------|
|              |          | Dongting Lake                | ND            | 13.7          | 10.96          |               | 36.5%     | [21]       |
|              |          | Surface Water                |               | 208           | 2.26           |               |           | [38]       |
|              |          | Surface Water                | 0.2           | 508           | 71.7           | 48.6          |           | [37]       |
|              |          | Surface Water in Basins      | ND            | 92.8          | 21.5           | 1.6           |           | [37]       |
|              |          | Xiaoqing River               | ND            | 22.07         | 1.5            |               |           | [44]       |
|              |          | Xiaoqing River (Mainstream)  | LOQ           | 13428         | 448            |               | 82.3%     | [46]       |
|              |          | Xiaoqing River (Tributaries) | 13.9          | 18076         | 392            |               | 80%       | [46]       |
|              |          | Xiong'an New Area            | ND            | 2.5           |                |               | 77%       | [3]        |
|              |          | Yangtze River (Nanjing)      | ND            | 12.57         | 2              |               |           | [81]       |
|              |          | Yellow River (Mainstream)    | 18.6          | 9185          | 323            |               | 78.8%     | [46]       |
|              |          | Yellow River (Tributaries)   | 20.6          | 8070          | 319            |               | 71.4%     | [46]       |
|              | France   | Charmoise River              | ND            | 1310          | 134            |               |           | [16]       |
|              | Malaysia | Larut River                  | LOQ           | 2.55          | 0.14           |               | 11.11%    | [62]       |
|              | Uganda   | Victoria Lake                | 2.9           | 51            |                | 25            | 88%       | [81]       |
| Difloxacin   | China    | Beijing                      | ND            | 6.3           |                | 1.6           | 50%       | [12]       |
|              |          | Changzhou                    | 5.9           | 7.9           |                | 7.7           | 100%      | [12]       |
|              |          | Dongting Lake                | ND            | 4.75          | 2.38           |               | 45%       | [21]       |
|              |          | Guangdong                    | 0.84          | 1.24          |                | 0.85          | 100%      | [24]       |
|              |          | Liaohe River Basins          | ND            | 4.54          | 0.2            |               | 6.9%      | [4]        |
|              |          | Surface Water                |               | 218.4         |                | 0.74          |           | [38]       |
| Levofloxacin | USA      | Columbia River               |               |               | 1              |               |           | [5]        |
|              |          | Sacramento River             |               |               | 2              |               |           | [5]        |
|              | China    | Chaohu Lake                  |               | 89.86         | <25            |               |           | [17]       |
|              |          | Surface Water                |               | 23.4          |                | 6             |           | [38]       |

Continuation S2

| Antibiotics  | Country      | Place                        | Min<br>(ng/L) | Max<br>(ng/L) | Mean<br>(ng/L) | Med<br>(ng/L) | Frequency | References |
|--------------|--------------|------------------------------|---------------|---------------|----------------|---------------|-----------|------------|
|              | South Africa | Apies River                  |               |               | 2.4            |               |           | [88]       |
|              | Uganda       | Victoria Lake                | 1.8           | 29            |                | 12            | 96%       | [81]       |
| Moxifloxacin | USA          | Sacramento River             |               |               | 0.012          |               |           | [5]        |
|              | China        | Liaohe River Basins          | ND            | 41.1          |                |               | 13.79%    | [4]        |
|              | China        |                              |               | 300           |                |               |           | [38]       |
|              | Spain        |                              | 1.4           | 9.8           |                |               | 7%        | [68]       |
| Flumequine   | China        | Estuary                      |               | 0.43          |                |               |           | [23]       |
|              |              | Liaohe River Basins          | ND            | 3.82          | 0.17           |               | 6.9%      | [4]        |
|              |              | North South China            |               | 22.6          |                |               |           | [53]       |
|              |              | Surface Water                |               | 137           |                | 0.83          |           | [38]       |
|              |              | Xiaoqing River (Tributaries) | LOQ           | 20.8          | LOQ (1.2)      |               | 43.1%     | [46]       |
|              |              | Xiong'an New Area            | ND            | 1.02          |                |               | 49%       | [3]        |
|              |              | Yang River                   |               | 0.39          |                |               |           | [23]       |
|              |              | Yellow River (Tributaries)   | LOQ           | 8.6           | LOQ (1.2)      |               | 47.6%     | [46]       |
|              | France       | Surface Water                |               | 16            |                |               |           | [25]       |
|              | Korea        | Chungcheong Province         |               | 1.58          |                |               |           | [53]       |
|              | Spain        | NE Catalonia                 |               | 8.9           |                |               |           | [53]       |

Table S3. Toxicity of selected fluoroquinolone towards various trophic groups of organisms.

| fluoroquinolone | group | organism                               | duration | EC50<br>(mg/L) | references |
|-----------------|-------|----------------------------------------|----------|----------------|------------|
| Ciprofloxacin   | algae | <i>Anabaena flosaquae</i>              | 72h      | 0.01           | [91]       |
|                 |       | <i>Chlorella sp.</i>                   | 72h      | 23             | [92]       |
|                 |       | <i>Chlorella vulgaris</i>              | 96h      | 31.07          | [93]       |
|                 |       | <i>Chlorella vulgaris</i>              | 96h      | 20.6           | [94, 95]   |
|                 |       | <i>Desmodesmus subspicatus</i>         | 72h      | >8.04          | [95]       |
|                 |       | <i>Desmodesmus subspicatus</i>         | 72h      | 8.8            | [95]       |
|                 |       | <i>Desmodesmus subspicatus</i>         | 72h      | 8.04           | [91]       |
|                 |       | <i>Microcystis panniformis</i>         | 96h      | 0.01           | [96]       |
|                 |       | <i>Microcystis aeruginosa</i>          | 24h      | 0.017          | [96, 97]   |
|                 |       | <i>Pseudokirchneriella subcapitata</i> | 72h      | 5.57           | [95]       |
|                 |       | <i>Pseudokirchneriella subcapitata</i> | 72h      | 11.3           | [95, 98]   |
|                 |       | <i>Pseudokirchneriella subcapitata</i> | 24h      | 18.7           | [97]       |
|                 |       | <i>Pseudokirchneriella subcapitata</i> | 96h      | 4.83           | [95]       |
|                 |       | <i>Pseudokirchneriella subcapitata</i> | 72h      | 6.7            | [95]       |
|                 |       | <i>Pseudokirchneriella subcapitata</i> | 72h      | 2.97           | [95]       |
|                 |       | <i>Raphidocelis subcapitata</i>        | 72h      | 1.25           | [99]       |
|                 |       | <i>Raphidocelis subcapitata</i>        | 96h      | 4.61           | [100]      |

|  |          |                                 |     |           |       |
|--|----------|---------------------------------|-----|-----------|-------|
|  |          | <i>Raphidocelis subcapitata</i> | 72h | 4.4       | [100] |
|  |          |                                 |     | 3.1       | [92]  |
|  | bacteria | <i>Cyanobacteria</i>            |     | 0.05      | [92]  |
|  |          | <i>Escherichia coli</i>         | 24h | 0.014     | [101] |
|  |          | <i>Pseudomonas fluorescens</i>  | 24h | 0.12-0.49 | [102] |
|  |          | <i>Pseudomonas putida</i>       | 11d | 0.08      | [103] |

## Continuation S3

| fluoroquinolone | group      | organism                               | duration | EC50 (mg/L)   | references |
|-----------------|------------|----------------------------------------|----------|---------------|------------|
|                 |            | <i>Synechococcus elongatus</i>         | 96h      | 0.06          | [100]      |
|                 |            | <i>Synechococcus elongatus</i>         | 72h      | 0.07          | [100]      |
|                 | crustacean | <i>Ceriodaphnia dubia</i>              | 21d      | 4             | [104]      |
|                 |            | <i>Daphnia magna</i>                   | 48h      | >100          | [6]        |
|                 |            | <i>Daphnia magna</i>                   | 21d      | 1.3-6.5(2.17) | [105]      |
|                 |            | <i>Daphnia magna</i>                   | 48h      | 28.59         | [106]      |
|                 |            | <i>Daphnia magna</i>                   | 24h      | >192          | [107]      |
|                 |            | <i>Daphnia magna</i>                   | 48h      | 60            | [6]        |
|                 |            | <i>Daphnia magna</i>                   |          | 87.14         | [6]        |
|                 |            | <i>Gammarus fossarum</i>               | 7d       | 13.6          | [108]      |
|                 |            | <i>Moina macrocopa</i>                 | 48h      | 71            | [92]       |
|                 | fish       | <i>Danio rerio</i>                     |          | 100           | [6]        |
|                 |            | <i>Pimephales promelas</i>             | 7d       | >10           | [6]        |
|                 |            |                                        |          | >60           | [92]       |
|                 | plant      | <i>Lemna minor</i>                     | 24h      | 0.2           | [97]       |
|                 |            | <i>Lemna minor</i>                     | 7d       | 0.63          | [91]       |
| Ofloxacin       | algae      | <i>Microcystis aeruginosa</i>          | 24h      | 0.02          | [97]       |
|                 |            | <i>Pseudokirchneriella subcapitata</i> | 72h      | 1.44          | [95]       |
|                 |            | <i>Pseudokirchneriella subcapitata</i> | 96h      | 4.74          | [95]       |
|                 |            | <i>Pseudokirchneriella subcapitata</i> | 72h      | 12.1          | [95, 97]   |
|                 |            | <i>Raphidocelis subcapitata</i>        | 72h      | 4.18          | [100]      |
|                 |            | <i>Raphidocelis subcapitata</i>        | 96h      | 4.26          | [100]      |
|                 | bacteria   | <i>Pseudomonas putida</i>              | 11d      | 0.01          | [103]      |

## Continuation S3

| fluoroquinolone | group      | organism                       | duration | EC50 (mg/L) | references |
|-----------------|------------|--------------------------------|----------|-------------|------------|
|                 |            | <i>Synechococcus elongatus</i> | 72h      | 0.14        | [100]      |
|                 |            | <i>Synechococcus elongatus</i> | 96h      | 0.1         | [107]      |
|                 |            | <i>Vibrio fischeri</i>         | 24h      | 0.014       | [109]      |
|                 | crustacean | <i>Ceriodaphnia dubia</i>      | 7d       | 10          | [6]        |
|                 |            | <i>Ceriodaphnia dubia</i>      | 24h      | 17.41       | [6]        |
|                 |            | <i>Ceriodaphnia dubia</i>      | 48h      | 26.7        | [6]        |
|                 |            | <i>Ceriodaphnia dubia</i>      | 7d       | 3.13        | [6]        |
|                 |            | <i>Daphnia magna</i>           | 48h      | 76.58       | [6]        |

|             |          |                                        |       |       |           |
|-------------|----------|----------------------------------------|-------|-------|-----------|
|             |          | <i>Daphnia magna</i>                   | 48h   | 31.75 | [6]       |
|             |          | <i>Daphnia magna</i>                   | 48h   | 17.41 | [6]       |
|             | fish     | <i>Danio rerio</i>                     | 10d   | >16   | [6]       |
|             |          | <i>Pimephales promelas</i>             | 7d    | 10    | [6]       |
|             | mollusk  | <i>Bellamya aeruginosa</i>             | 96h   | 149.3 | [110]     |
|             |          | <i>Bellamya aeruginosa</i>             | 48h   | 222.6 | [110]     |
|             | plant    | <i>Lemna minor</i>                     | 24h   | 0.13  | [97]      |
| Norfloxacin | algae    | <i>Chlorella vulgaris</i>              | 72h   | 10.4  | [95, 111] |
|             |          | <i>Desmodesmus subspicatus</i>         | 72h   | 6.8   | [95]      |
|             |          | <i>Pseudokirchneriella subcapitata</i> | 72h   | 16.6  | [95]      |
|             |          | <i>Pseudokirchneriella subcapitata</i> | 72h   | 1.8   | [95]      |
|             |          | <i>Scenedesmus obliquus</i>            | 96h   | 38.49 | [112]     |
|             |          | <i>Selenastrum capricornutum</i>       | 72h   | 16.6  | [111]     |
|             | bacteria | <i>Anabaena</i> sp CPB4337             | 72h   | 5.6   | [109]     |
|             |          | <i>Vibrio fischeri</i>                 | 15min | 23.6  | [109]     |

## Continuation S3

| fluoroquinolone | group      | organism                               | duration | EC50 (mg/L)      | references |
|-----------------|------------|----------------------------------------|----------|------------------|------------|
|                 | crustacean | <i>Ceriodaphnia dubia</i>              | 21d      | 4                | [104]      |
|                 | mollusk    | <i>Bellamya aeruginosa</i>             | 48h      | 141.3            | [110]      |
|                 |            | <i>Bellamya aeruginosa</i>             | 96h      | 104.5            | [110]      |
|                 | plant      | <i>Lactuca sativa</i>                  | 5d       | 336              | [113]      |
| Enrofloxacin    | algae      | <i>Anabaena flosaquae</i>              | 72h      | 0.17             | [97]       |
|                 |            | <i>Chlorella vulgaris</i>              | 96h      | 0.12             | [113]      |
|                 |            | <i>Desmodesmus subspicatus</i>         | 3d       | 5.57             | [91, 114]  |
|                 |            | <i>Microcystis aeruginosa</i>          | 24h      | 0.05             | [97, 114]  |
|                 |            | <i>Microcystis aeruginosa</i>          | 72h      | 0.07-0.11(0.092) | [96, 97]   |
|                 |            | <i>Pseudokirchneriella subcapitata</i> | 3d       | 3.1              | [114]      |
|                 |            | <i>Pseudokirchneriella subcapitata</i> | 24h      | 3.1              | [97]       |
|                 |            | <i>Pseudokirchneriella subcapitata</i> | 96h      | 5.18             | [115]      |
|                 | bacteria   |                                        |          | 2.97             | [92, 97]   |
|                 |            | <i>Cyanobacteria</i>                   |          | 0.01             | [92]       |
|                 | crustacean | <i>Ceriodaphnia dubia</i>              | 21d      | 5                | [104]      |
|                 |            | <i>Daphnia magna</i>                   | 48h      | 16.72            | [116]      |
|                 |            | <i>Daphnia magna</i>                   | 21d      | 24-36(30)        | [105]      |
|                 |            | <i>Daphnia magna</i>                   | 48h      | 28.59            | [106]      |
|                 |            | <i>Moina macrocopa</i>                 | 48h      | 71               | [92]       |
|                 |            | <i>Moina macrocopa</i>                 | 48h      | 69               | [92]       |
|                 |            |                                        |          | 79.5             | [92]       |
|                 | fish       |                                        |          |                  |            |
|                 | plant      | <i>Lemna minor</i>                     | 7d       | 0.11             | [91]       |
|                 |            | <i>Lemna minor</i>                     | 7d       | 0.114            | [114]      |

## Continuation S3

| fluoroquinolone | group      | organism                               | duration | EC50<br>(mg/L) | references |
|-----------------|------------|----------------------------------------|----------|----------------|------------|
|                 |            | <i>Lemna minor</i>                     | 24h      | 0.11           | [97]       |
|                 |            | <i>Lemna minor</i>                     | 7d       | 0.107          | [114]      |
| Lomefloxacin    | algae      | <i>Microcystis aeruginosa</i>          | 24h      | 0.19           | [97]       |
|                 | bacteria   | <i>Vibrio fischeri</i>                 | 24h      | 0.022          | [109]      |
|                 | plant      | <i>Lemna minor</i>                     | 24h      | 0.11           | [97]       |
| Marbofloxacin   | crustacean | <i>Ceriodaphnia dubia</i>              | 21d      | 17             | [104]      |
| Enoxacin        | bacteria   | <i>Vibrio fischeri</i>                 | 24h      | 0.049          | [109]      |
| Levofloxacin    | algae      | <i>Microcystis aeruginosa</i>          | 24h      | 0.008          | [97]       |
|                 | bacteria   | <i>Streptococcus pneumoniae</i>        | 24h      | 3.57           | [117]      |
|                 | crustacean | <i>Ceriodaphnia dubia</i>              | 21d      | 11             | [104]      |
|                 |            | <i>Daphnia magna</i>                   | 21d      | 6              | [104]      |
|                 |            | <i>Daphnia magna</i>                   | 48h      | >40            | [116]      |
|                 | plant      | <i>Lemna gibba</i>                     | 14d      | 1.15           | [118]      |
| Moxifloxacin    | algae      | <i>Chorella sorokiniana</i>            | 96h      | 28.42          | [119]      |
|                 |            | <i>Microcystis aeruginosa</i>          | 96h      | 60.34          | [120]      |
|                 |            | <i>Scenedesmus dimorphus</i>           | 96h      | 26.37          | [119]      |
|                 | crustacean | <i>Ceriodaphnia dubia</i>              | 21d      | 26.00          | [104]      |
|                 |            | <i>Daphnia magna</i>                   | 21d      | 7.00           | [104]      |
|                 | mollusk    | <i>Glochidia</i>                       | 24h      | 120.00         | [121]      |
| Flumequine      | algae      | <i>Dunaliella salina</i>               | 7d       | 18             | [122]      |
|                 |            | <i>Microcystis aeruginosa</i>          | 24h      | 1.96           | [97]       |
|                 |            | <i>Microcystis aeruginosa</i>          | 24h      | >8.8           | [123]      |
|                 |            | <i>Pseudokirchneriella subcapitata</i> | 24h      | 5              | [97]       |

## Continuation S3

| fluoroquinolone | group      | organism                               | duration | EC50<br>(mg/L) | references |
|-----------------|------------|----------------------------------------|----------|----------------|------------|
|                 |            | <i>Pseudokirchneriella subcapitata</i> | 24h      | ≈16            | [123]      |
|                 |            | <i>Pseudokirchneriella subcapitata</i> | 96h      | 2.6            | [124]      |
|                 |            | <i>Selenastrum capricornutum</i>       | 7d       | 5              | [122]      |
|                 | bacteria   | <i>Pseudomonas putida</i>              | 16h      | 0.82           | [124]      |
|                 |            | <i>Vibrio fischeri</i>                 | 30min    | 12.10-15.34    | [125]      |
|                 |            | <i>Vibrio fischeri</i>                 | 15min    | 11             | [124]      |
|                 | crustacean | <i>Daphnia magna</i>                   | 48h      | 25.35          | [116]      |
|                 |            | <i>Daphnia magna</i>                   | 24h      | 59             | [124]      |
|                 | mollusk    | <i>Arbacia lixula</i>                  | 72h      | 75.4           | [126]      |
|                 |            | <i>Paracentrotus lividus</i>           | 48h      | 31.01          | [126]      |
|                 | plant      | <i>Lemna minor</i>                     | 24h      | 2.47           | [97]       |
|                 |            | <i>Lemna minor</i>                     | 7d       | 3              | [124]      |

## References

1. Wu S., Hua P., Gui D., Zhang J., Ying G., Krebs P. Occurrences, transport drivers, and risk assessments of antibiotics in typical oasis surface and groundwater. *Water Res.* **2022**, 225, 119138. <http://doi.org/10.1016/j.watres.2022.119138>

2. Yu X., Yu F., Li Z., Zhan J. Occurrence, distribution, and ecological risk assessment of pharmaceuticals and personal care products in the surface water of the middle and lower reaches of the Yellow River (Henan section). *J Hazard Mater*, **2023**, 443, 130369. <http://doi.org/10.1016/j.jhazmat.2022.130369>
3. Fu C., Xu B., Chen H., Zhao X., Li G., Zheng Y., Qiu W., Zheng C., Duan L., Wang W. Occurrence and distribution of antibiotics in groundwater, surface water, and sediment in Xiong'an New Area, China, and their relationship with antibiotic resistance genes. *Sci Total Environ*, **2022**, 807, 151011. <http://doi.org/10.1016/j.scitotenv.2021.151011>
4. Gao H., Zhao F., Li R., Jin S., Zhang H., Zhang K., Li S., Shu Q., Na G. Occurrence and distribution of antibiotics and antibiotic resistance genes in water of Liaoh River Basin, China. *Journal of Environmental Chemical Engineering*, **2022**, 10. <http://doi.org/10.1016/j.jece.2022.108297>
5. Mortimer M., Winchell A., Holden P.A. Evaluation of frameworks proposed as protective of antimicrobial resistance propagation in the environment. *Environ Int*, **2020**, 144, 106053. <http://doi.org/10.1016/j.envint.2020.106053>
6. Kovalakova P., Cizmas L., McDonald T.J., Marsalek B., Feng M., Sharma V.K. Occurrence and toxicity of antibiotics in the aquatic environment: A review. *Chemosphere*, **2020**, 251, 126351. <http://doi.org/10.1016/j.chemosphere.2020.126351>
7. Mastrangelo M.M., Valdes M.E., Eissa B., Ossana N.A., Barcelo D., Sabater S., Rodriguez-Mozaz S., Giorgi A.D.N. Occurrence and accumulation of pharmaceutical products in water and biota of urban lowland rivers. *Sci Total Environ*, **2022**, 828, 154303. <http://doi.org/10.1016/j.scitotenv.2022.154303>
8. Angeles L.F., Islam S., Aldstadt J., Saqeeb K.N., Alam M., Khan M.A., Johura F.T., Ahmed S.I., Aga D.S. Retrospective suspect screening reveals previously ignored antibiotics, antifungal compounds, and metabolites in Bangladesh surface waters. *Sci Total Environ*, **2020**, 712, 136285. <http://doi.org/10.1016/j.scitotenv.2019.136285>
9. Gomes M.P., Brito J.C.M., Vieira F., Kitamura R.S.A., Juneau P. Emerging Contaminants in Streams of Doce River Watershed, Minas Gerais, Brazil. *Frontiers in Environmental Science*, **2022**, 9. <http://doi.org/10.3389/fenvs.2021.801599>
10. Wu Q., Xiao S.K., Pan C.G., Yin C., Wang Y.H., Yu K.F. Occurrence, source apportionment and risk assessment of antibiotics in water and sediment from the subtropical Beibu Gulf, South China. *Sci Total Environ*, **2022**, 806, 150439. <http://doi.org/10.1016/j.scitotenv.2021.150439>
11. Su D., Ben W., Strobel B.W., Qiang Z. Impacts of wastewater treatment plant upgrades on the distribution and risks of pharmaceuticals in receiving rivers. *J Hazard Mater*, **2021**, 406, 124331. <http://doi.org/10.1016/j.jhazmat.2020.124331>
12. Ding G., Chen G., Liu Y., Li M., Liu X. Occurrence and risk assessment of fluoroquinolone antibiotics in reclaimed water and receiving groundwater with different replenishment pathways. *Sci Total Environ*, **2020**, 738, 139802. <http://doi.org/10.1016/j.scitotenv.2020.139802>
13. Zhang L., Bai J., Zhang K., Wang Y., Xiao R., Campos M., Acuna J., Jorquera M.A. Occurrence, bioaccumulation and ecological risks of antibiotics in the water-plant-sediment systems in different functional areas of the largest shallow lake in North China: Impacts of river input and historical agricultural activities. *Sci Total Environ*, **2023**, 857, 159260. <http://doi.org/10.1016/j.scitotenv.2022.159260>
14. Lu S., Lin C., Lei K., Xin M., Gu X., Lian M., Wang B., Liu X., Ouyang W., He M. Profiling of the spatiotemporal distribution, risks, and prioritization of antibiotics in the waters of Laizhou Bay, northern China. *J Hazard Mater*, **2022**, 424, 127487. <http://doi.org/10.1016/j.jhazmat.2021.127487>
15. Wang C., Lu Y., Wang C., Xiu C., Cao X., Zhang M., Song S. Distribution and ecological risks of pharmaceuticals and personal care products with different anthropogenic stresses in a coastal watershed of China. *Chemosphere*, **2022**, 303, 135176. <http://doi.org/10.1016/j.chemosphere.2022.135176>
16. Yang Q., Gao Y., Ke J., Show P.L., Ge Y., Liu Y., Guo R., Chen J. Antibiotics: An overview on the environmental occurrence, toxicity, degradation, and removal methods. *Bioengineered*, **2021**, 12, 7376-7416. <http://doi.org/10.1080/21655979.2021.1974657>
17. Zhang F., Yang L., Wang H. Co-occurrence characteristics of antibiotics and estrogens and their relationships in a lake system affected by wastewater. *J Environ Qual*, **2020**, 49, 1322-1333. <http://doi.org/10.1002/jeq2.20128>
18. Zhou Q., Liu G., Arif M., Shi X., Wang S. Occurrence and risk assessment of antibiotics in the surface water of Chaohu Lake and its tributaries in China. *Sci Total Environ*, **2022**, 807, 151040. <http://doi.org/10.1016/j.scitotenv.2021.151040>
19. Omufere L.O., Maseko B., Olowoyo J.O. Occurrence of antibiotics in wastewater from hospital and convectional wastewater treatment plants and their impact on the effluent receiving rivers: current knowledge between 2010 and 2019. *Environ Monit Assess*, **2022**, 194, 306. <http://doi.org/10.1007/s10661-022-09846-4>
20. Guo X., Song R., Lu S., Liu X., Chen J., Wan Z., Bi B. Multi-Media Occurrence of Antibiotics and Antibiotic Resistance Genes in East Dongting Lake. *Frontiers in Environmental Science*, **2022**, 10. <http://doi.org/10.3389/fenvs.2022.866332>
21. Zhang B., Xu L., Hu Q., Zeng X., Yu Z. Occurrence, spatiotemporal distribution and potential ecological risks of antibiotics in Dongting Lake, China. *Environ Monit Assess*, **2020**, 192, 804. <http://doi.org/10.1007/s10661-020-08761-w>
22. Li J.Y., Wen J., Chen Y., Wang Q., Yin J. Antibiotics in cultured freshwater products in Eastern China: Occurrence, human health risks, sources, and bioaccumulation potential. *Chemosphere*, **2021**, 264, 128441. <http://doi.org/10.1016/j.chemosphere.2020.128441>
23. Liu K., Zhang D., Xiao X., Cui L., Zhang H. Occurrence of quinolone antibiotics and their impacts on aquatic environment in typical river-estuary system of Jiaozhou Bay, China. *Ecotoxicol Environ Saf*, **2020**, 190, 109993. <http://doi.org/10.1016/j.ecoenv.2019.109993>
24. Chen Y., Xie Q., Wan J., Yang S., Wang Y., Fan H. Occurrence and risk assessment of antibiotics in multifunctional reservoirs in Dongguan, China. *Environ Sci Pollut Res Int*, **2020**, 27, 13565-13574. <http://doi.org/10.1007/s11356-019-07436-5>
25. Huang L., Mo Y., Wu Z., Rad S., Song X., Zeng H., Bashir S., Kang B., Chen Z. Occurrence, distribution, and health risk assessment of quinolone antibiotics in water, sediment, and fish species of Qingshitian reservoir, South China. *Sci Rep*, **2020**, 10, 15777. <http://doi.org/10.1038/s41598-020-72324-9>
26. Chen J., Huang L., Wang Q., Zeng H., Xu J., Chen Z. Antibiotics in aquaculture ponds from Guilin, South of China: Occurrence, distribution, and health risk assessment. *Environ Res*, **2022**, 204, 112084. <http://doi.org/10.1016/j.envres.2021.112084>
27. Li X., Wang B., Liu F., Yu G. Occurrence and Removal of Pharmaceutical Contaminants in Urine: A Review. *Water*, **2023**, 15. <http://doi.org/10.3390/w15081517>
28. Wang C., Lu Y., Sun B., Zhang M., Wang R., Li X., Mao R., Cao Z., Song S. Contamination, transport, and ecological risks of pharmaceuticals and personal care products in a large irrigation region. *Sci Total Environ*, **2022**, 851, 158179. <http://doi.org/10.1016/j.scitotenv.2022.158179>
29. Liu J., Deng W.J., Ying G.G., Tsang E.P.K., Hong H.C. Occurrence and distribution of antibiotics in surface water. *Ecotoxicology*, **2022**, 31, 1111-1119. <http://doi.org/10.1007/s10646-022-02567-x>
30. Hu Y., Li L., Li B., Peng L., Xu Y., Zhou X., Li R., Song K. Spatial variations and ecological risks assessment of pharmaceuticals and personal care products (PPCPs) in typical lakes of Wuhan, China. *Process Safety and Environmental Protection*, **2023**, 174, 828-837. <http://doi.org/10.1016/j.psep.2023.05.006>

31. Maghsodian Z., Sanati A.M., Mashifana T., Sillanpaa M., Feng S., Nhat T., Ramavandi B. Occurrence and Distribution of Antibiotics in the Water, Sediment, and Biota of Freshwater and Marine Environments: A Review. *Antibiotics (Basel)*, **2022**, *11*. <http://doi.org/10.3390/antibiotics11111461>
32. Zhang G., Liu X., Lu S., Zhang J., Wang W. Occurrence of typical antibiotics in Nansi Lake's inflowing rivers and antibiotic source contribution to Nansi Lake based on principal component analysis-multiple linear regression model. *Chemosphere*, **2020**, *242*, 125269. <http://doi.org/10.1016/j.chemosphere.2019.125269>
33. Shi J., Dong Y., Shi Y., Yin T., He W., An T., Tang Y., Hou X., Chong S., Chen D., Qin K., Lin H. Groundwater antibiotics and microplastics in a drinking-water source area, northern China: Occurrence, spatial distribution, risk assessment, and correlation. *Environ Res*, **2022**, *210*, 112855. <http://doi.org/10.1016/j.envres.2022.112855>
34. Yin Z. Distribution and ecological risk assessment of typical antibiotics in the surface waters of seven major rivers, China. *Environ Sci Process Impacts*, **2021**, *23*, 1088-1100. <http://doi.org/10.1039/d1em00079a>
35. Wang C., Zhao Y., Liu S., Xiao Q., Liang W., Song Y. Contamination, distribution, and risk assessment of antibiotics in the urban surface water of the Pearl River in Guangzhou, South China. *Environ Monit Assess*, **2021**, *193*, 98. <http://doi.org/10.1007/s10661-021-08887-5>
36. Yang H., Xu M., Wang L., Wang X., Jeppesen E., Zhang W. Metagenomic analysis to determine the characteristics of antibiotic resistance genes in typical antibiotic-contaminated sediments. *J Environ Sci (China)*, **2023**, *128*, 12-25. <http://doi.org/10.1016/j.jes.2022.08.014>
37. Huang F., An Z., Moran M.J., Liu F. Recognition of typical antibiotic residues in environmental media related to groundwater in China (2009-2019). *J Hazard Mater*, **2020**, *399*, 122813. <http://doi.org/10.1016/j.jhazmat.2020.122813>
38. Li Z., Li M., Zhang Z., Li P., Zang Y., Liu X. Antibiotics in aquatic environments of China: A review and meta-analysis. *Ecotoxicol Environ Saf*, **2020**, *199*, 110668. <http://doi.org/10.1016/j.ecoenv.2020.110668>
39. Chen C.X., Aris A., Yong E.L., Noor Z.Z. Evaluation of the occurrence of antibiotics at different treatment stages of decentralised and conventional sewage treatment plants. *International Journal of Environmental Science and Technology*, **2021**, *19*, 5547-5562. <http://doi.org/10.1007/s13762-021-03519-4>
40. Yang J., Huang Y., Chen Y., Hassan M., Zhang X., Zhang B., Gin K.Y., He Y. Multi-phase distribution, spatiotemporal variation and risk assessment of antibiotics in a typical urban-rural watershed. *Ecotoxicol Environ Saf*, **2020**, *206*, 111156. <http://doi.org/10.1016/j.ecoenv.2020.111156>
41. Wu Y., Song S., Chen X., Shi Y., Cui H., Liu Y., Yang S. Source-specific ecological risks and critical source identification of PPCPs in surface water: Comparing urban and rural areas. *Sci Total Environ*, **2023**, *854*, 158792. <http://doi.org/10.1016/j.scitotenv.2022.158792>
42. Ramírez-Morales D., Masís-Mora M., Montiel-Mora J.R., Cambronero-Heinrichs J.C., Pérez-Rojas G., Tormo-Budowski R., Méndez-Rivera M., Briceño-Guevara S., Gutiérrez-Quirós J.A., Arias-Mora V., Brenes-Alfaro L., Beita-Sandí W., Rodríguez-Rodríguez C.E. Multi-residue analysis of pharmaceuticals in water samples by liquid chromatography-mass spectrometry: Quality assessment and application to the risk assessment of urban-influenced surface waters in a metropolitan area of Central America. *Process Safety and Environmental Protection*, **2021**, *153*, 289-300. <http://doi.org/10.1016/j.psep.2021.07.025>
43. Wang R., Ji M., Zhai H., Guo Y., Liu Y. Occurrence of antibiotics and antibiotic resistance genes in WWTP effluent-receiving water bodies and reclaimed wastewater treatment plants. *Sci Total Environ*, **2021**, *796*, 148919. <http://doi.org/10.1016/j.scitotenv.2021.148919>
44. Ci M., Zhang G., Yan X., Dong W., Xu W., Wang W., Fan Y. Occurrence of antibiotics in the Xiaoqing River basin and antibiotic source contribution—a case study of Jinan city, China. *Environ Sci Pollut Res Int*, **2021**, *28*, 25241-25254. <http://doi.org/10.1007/s11356-020-12202-z>
45. Li J., Cui M., Zhang H. Spatial and temporal variations of antibiotics in a tidal river. *Environ Monit Assess*, **2020**, *192*, 336. <http://doi.org/10.1007/s10661-020-08313-2>
46. Wang K., Su Z., Reguay F., Bian R., Li W., Yu H., Sun Y., Zhuang Y., Shang W. Seasonal occurrence of multiple classes of antibiotics in East China rivers and their association with suspended particulate matter. *Sci Total Environ*, **2022**, *853*, 158579. <http://doi.org/10.1016/j.scitotenv.2022.158579>
47. He P., Wu J., Peng J., Wei L., Zhang L., Zhou Q., Wu Z. Pharmaceuticals in drinking water sources and tap water in a city in the middle reaches of the Yangtze River: occurrence, spatiotemporal distribution, and risk assessment. *Environ Sci Pollut Res Int*, **2022**, *29*, 2365-2374. <http://doi.org/10.1007/s11356-021-15363-7>
48. Zhang G., Lu S., Wang Y., Liu X., Liu Y., Xu J., Zhang T., Wang Z., Yang Y. Occurrence of antibiotics and antibiotic resistance genes and their correlations in lower Yangtze River, China. *Environ Pollut*, **2020**, *257*, 113365. <http://doi.org/10.1016/j.envpol.2019.113365>
49. Feng J., Liu Q., Ru X., Xi N., Sun J. Occurrence and distribution of priority pharmaceuticals in the Yellow River and the Huai River in Henan, China. *Environ Sci Pollut Res Int*, **2020**, *27*, 16816-16826. <http://doi.org/10.1007/s11356-020-08131-6>
50. Sun J., Ke Z., Zhang Y., Wu Q., Chen Y., Tang J. Pharmaceutical active compounds in a heavily industrialized and urbanized bay, Eastern China. *Environ Sci Pollut Res Int*, **2023**, *30*, 51624-51637. <http://doi.org/10.1007/s11356-023-26019-z>
51. Malev O., Babic S., Sima Cota A., Stipanicev D., Repec S., Dmic M., Lovric M., Bojanic K., Radic Brkanac S., Coz-Rakovac R., Klobucar G. Combining short-term bioassays using fish and crustacean model organisms with ToxCast in vitro data and broad-spectrum chemical analysis for environmental risk assessment of the river water (Sava, Croatia). *Environ Pollut*, **2022**, *292*, 118440. <http://doi.org/10.1016/j.envpol.2021.118440>
52. Rodriguez-Mozaz S., Vaz-Moreira I., Varela Della Giustina S., Llorca M., Barcelo D., Schubert S., Berendonk T.U., Michael-Kordatou I., Fatta-Kassinos D., Martinez J.L., Elpers C., Henriques I., Jaeger T., Schwartz T., Paulshus E., O'sullivan K., Parmanen K.M.M., Virta M., Do T.T., Walsh F., Manaia C.M. Antibiotic residues in final effluents of European wastewater treatment plants and their impact on the aquatic environment. *Environ Int*, **2020**, *140*, 105733. <http://doi.org/10.1016/j.envint.2020.105733>
53. Zainab S.M., Junaid M., Xu N., Malik R.N. Antibiotics and antibiotic resistant genes (ARGs) in groundwater: A global review on dissemination, sources, interactions, environmental and human health risks. *Water Res*, **2020**, *187*, 116455. <http://doi.org/10.1016/j.watres.2020.116455>
54. Miranda C.D., Concha C., Godoy F.A., Lee M.R. Aquatic Environments as Hotspots of Transferable Low-Level Quinolone Resistance and Their Potential Contribution to High-Level Quinolone Resistance. *Antibiotics (Basel)*, **2022**, *11*. <http://doi.org/10.3390/antibiotics11111487>
55. Arun S., Xin L., Gaonkar O., Neppolian B., Zhang G., Chakraborty P. Antibiotics in sewage treatment plants, receiving water bodies and groundwater of Chennai city and the suburb, South India: Occurrence, removal efficiencies, and risk assessment. *Sci Total Environ*, **2022**, *851*, 158195. <http://doi.org/10.1016/j.scitotenv.2022.158195>
56. Singh V., Suthar S. Occurrence, seasonal variations, and ecological risk of pharmaceuticals and personal care products in River Ganges at two holy cities of India. *Chemosphere*, **2021**, *268*, 129331. <http://doi.org/10.1016/j.chemosphere.2020.129331>

57. O'flynn D., Lawler J., Yusuf A., Parle-Mcdermott A., Harold D., Mc Cloughlin T., Holland L., Regan F., White B. A review of pharmaceutical occurrence and pathways in the aquatic environment in the context of a changing climate and the COVID-19 pandemic. *Anal Methods*, **2021**, 13, 575-594. <http://doi.org/10.1039/d0ay02098b>
58. Muriuki C.W., Home P.G., Raude J.M., Ngumba E.K., Munala G.K., Kairigo P.K., Gachanja A.N., Tuhkanen T.A. Occurrence, distribution, and risk assessment of pharmaceuticals in wastewater and open surface drains of peri-urban areas: Case study of Juja town, Kenya. *Environ Pollut*, **2020**, 267, 115503. <http://doi.org/10.1016/j.envpol.2020.115503>
59. K'oreje K., Okoth M., Van Langenhove H., Demeestere K. Occurrence and point-of-use treatment of contaminants of emerging concern in groundwater of the Nzoia River basin, Kenya. *Environ Pollut*, **2022**, 297, 118725. <http://doi.org/10.1016/j.envpol.2021.118725>
60. Kairigo P., Ngumba E., Sundberg L.-R., Gachanja A., Tuhkanen T. Contamination of Surface Water and River Sediments by Antibiotic and Antiretroviral Drug Cocktails in Low and Middle-Income Countries: Occurrence, Risk and Mitigation Strategies. *Water*, **2020**, 12. <http://doi.org/10.3390/w12051376>
61. Khairul Hasni N.A., Anual Z.F., Rashid S.A., Syed Abu Thahir S., Veloo Y., Fang K.S., Mazeli M.I. Occurrence of endocrine disruptors in Malaysia's water systems: A scoping review. *Environ Pollut*, **2023**, 324, 121095. <http://doi.org/10.1016/j.envpol.2023.121095>
62. Low K., Chai L., Lee C., Zhang G., Zhang R., Vahab V., Bong C. Prevalence and risk assessment of antibiotics in riverine estuarine waters of Larut and Sangga Besar River, Perak. *Journal of Oceanology and Limnology*, **2020**, 39, 122-134. <http://doi.org/10.1007/s00343-020-9246-y>
63. Truong T., Hoang T.L., Tran L.T., Pham T.P.T., Le T.-H. Prevalence of Antibiotic Resistance Genes in the Saigon River Impacted by Anthropogenic Activities. *Water*, **2021**, 13. <http://doi.org/10.3390/w13162234>
64. Vilca F.Z., Galarza N.C., Tejedo J.R., Cuba W.A.Z., Quiróz C.N.C., Tornisiello V.L. Occurrence of residues of veterinary antibiotics in water, sediment and trout tissue (*Oncorhynchus mykiss*) in the southern area of Lake Titicaca, Peru. *Journal of Great Lakes Research*, **2021**, 47, 1219-1227. <http://doi.org/10.1016/j.jglr.2021.04.012>
65. Giebulitowicz J., Nalecz-Jawecki G., Harnisz M., Kucharski D., Korzeniewska E., Plaza G. Environmental Risk and Risk of Resistance Selection Due to Antimicrobials' Occurrence in Two Polish Wastewater Treatment Plants and Receiving Surface Water. *Molecules*, **2020**, 25. <http://doi.org/10.3390/molecules25061470>
66. Serra-Compte A., Pikkemaat M.G., Elferink A., Almeida D., Diogene J., Campillo J.A., Llorca M., Alvarez-Munoz D., Barcelo D., Rodriguez-Mozaz S. Combining an effect-based methodology with chemical analysis for antibiotics determination in wastewater and receiving freshwater and marine environment. *Environ Pollut*, **2021**, 271, 116313. <http://doi.org/10.1016/j.envpol.2020.116313>
67. Fonseca E., Hernandez F., Ibanez M., Rico A., Pitarch E., Bijlsma L. Occurrence and ecological risks of pharmaceuticals in a Mediterranean river in Eastern Spain. *Environ Int*, **2020**, 144, 106004. <http://doi.org/10.1016/j.envint.2020.106004>
68. Gozzo S., Moles S., Kińska K., Ormad M.P., Mosteo R., Gómez J., Laborda F., Szpunar J. Screening for Antibiotics and Their Degradation Products in Surface and Wastewaters of the POCTEFA Territory by Solid-Phase Extraction-UPLC-Electrospray MS/MS. *Water*, **2022**, 15. <http://doi.org/10.3390/w15010014>
69. Golovko O., Orn S., Sorengard M., Frieberg K., Nassazzi W., Lai F.Y., Ahrens L. Occurrence and removal of chemicals of emerging concern in wastewater treatment plants and their impact on receiving water systems. *Sci Total Environ*, **2021**, 754, 142122. <http://doi.org/10.1016/j.scitotenv.2020.142122>
70. Nantaba F., Wasswa J., Kylin H., Palm W.U., Bouwman H., Kummerer K. Occurrence, distribution, and ecotoxicological risk assessment of selected pharmaceutical compounds in water from Lake Victoria, Uganda. *Chemosphere*, **2020**, 239, 124642. <http://doi.org/10.1016/j.chemosphere.2019.124642>
71. Dalahmeh S., Bjornberg E., Elenstrom A.K., Niwagaba C.B., Komakech A.J. Pharmaceutical pollution of water resources in Nakivubo wetlands and Lake Victoria, Kampala, Uganda. *Sci Total Environ*, **2020**, 710, 136347. <http://doi.org/10.1016/j.scitotenv.2019.136347>
72. Da Le N., Hoang A.Q., Hoang T.T.H., Nguyen T.a.H., Duong T.T., Pham T.M.H., Nguyen T.D., Hoang V.C., Le H.T., Tran C.S., Dang T.H., Vu N.T., Nguyen T.N., Le T.P.Q. Antibiotic and antiparasitic residues in surface water of urban rivers in the Red River Delta (Hanoi, Vietnam): concentrations, profiles, source estimation, and risk assessment. *Environ Sci Pollut Res Int*, **2021**, 28, 10622-10632. <http://doi.org/10.1007/s11356-020-11329-3>
73. Wang L., Li H., Dang J., Guo H., Zhu Y., Han W. Occurrence, distribution, and partitioning of antibiotics in surface water and sediment in a typical tributary of Yellow River, China. *Environ Sci Pollut Res Int*, **2021**, 28, 28207-28221. <http://doi.org/10.1007/s11356-021-12634-1>
74. Zhao B., Xu J., Zhang G., Lu S., Liu X., Li L., Li M. Occurrence of antibiotics and antibiotic resistance genes in the Fuxian Lake and antibiotic source analysis based on principal component analysis-multiple linear regression model. *Chemosphere*, **2021**, 262, 127741. <http://doi.org/10.1016/j.chemosphere.2020.127741>
75. Peng Q., Song J., Li X., Yuan H., Liu M., Duan L., Zuo J. Pharmaceutically active compounds (PhACs) in surface sediments of the Jiaozhou Bay, north China. *Environ Pollut*, **2020**, 266, 115245. <http://doi.org/10.1016/j.envpol.2020.115245>
76. Dong J., Yan D., Mo K., Chen Q., Zhang J., Chen Y., Wang Z. Antibiotics along an alpine river and in the receiving lake with a catchment dominated by grazing husbandry. *J Environ Sci (China)*, **2022**, 115, 374-382. <http://doi.org/10.1016/j.jes.2021.08.007>
77. Liu Y., Cai D., Li X., Wu Q., Ding P., Shen L., Yang J., Hu G., Wu J., Zhang L. Occurrence, fate, and risk assessment of antibiotics in typical pharmaceutical manufacturing and receiving water bodies from different regions. *PLoS One*, **2023**, 18, e0270945. <http://doi.org/10.1371/journal.pone.0270945>
78. Ding J., Jiang H., Wu X., Zhang S., Mamitana Razanajatovo R., Zou H. Investigation and assessment of environmental pollution in Gonghu Bay, Taihu Lake, China: A year-long study. *Human and Ecological Risk Assessment: An International Journal*, **2019**, 26, 906-920. <http://doi.org/10.1080/10807039.2018.1545565>
79. Yuntao Z., Jiang L., Tianyu W., Kai M., Zhentao C., Qianwen Y., Yongheng D., Yu C., Bin W., Xia H. Characteristics of antibiotic resistance genes and microbial community distribution in Wanfeng Lake, upper Pearl River, China. *Environmental Science and Pollution Research*, **2023**.
80. Omufere L.O., Maseko B., Olowoyo J.O. Occurrence of antibiotics in wastewater from hospital and convectional wastewater treatment plants and their impact on the effluent receiving rivers: current knowledge between 2010 and 2019. *Environmental Monitoring and Assessment*, **2022**, 194, -.
81. Liu Y., Chen Y., Feng M., Chen J., Shen W., Zhang S. Occurrence of antibiotics and antibiotic resistance genes and their correlations in river-type drinking water source, China. *Environ Sci Pollut Res Int*, **2021**, 28, 42339-42352. <http://doi.org/10.1007/s11356-021-13637-8>
82. Lin H., Huang L., Gao Z., Lin W., Ren Y. Comparative analysis of the removal and transformation of 10 typical pharmaceutical and personal care products in secondary treatment of sewage: A case study of two biological treatment processes. *Journal of Environmental Chemical Engineering*, **2022**, 10. <http://doi.org/10.1016/j.jece.2022.107638>



83. Hanna N., Purohit M., Diwan V., Chandran S.P., Riggi E., Parashar V., Tamhankar A.J., Lundborg C.S. Monitoring of Water Quality, Antibiotic Residues, and Antibiotic-Resistant *Escherichiacoli* in the Kshipra River in India over a 3-Year Period. *Int J Environ Res Public Health*, **2020**, 17. <http://doi.org/10.3390/ijerph17217706>
84. Lenart-Boron A., Prajsnar J., Guzik M., Boron P., Chmiel M. How much of antibiotics can enter surface water with treated wastewater and how it affects the resistance of waterborne bacteria: A case study of the Bialka river sewage treatment plant. *Environ Res*, **2020**, 191, 110037. <http://doi.org/10.1016/j.envres.2020.110037>
85. Reis E.O., Santos L.V.S., Lange L.C. Prioritization and environmental risk assessment of pharmaceuticals mixtures from Brazilian surface waters. *Environ Pollut*, **2021**, 288, 117803. <http://doi.org/10.1016/j.envpol.2021.117803>
86. Lee S., Kim C., Liu X., Lee S., Kho Y., Kim W.K., Kim P., Choi K. Ecological Risk Assessment of Amoxicillin, Enrofloxacin, and Neomycin: Are Their Current Levels in the Freshwater Environment Safe? *Toxics*, **2021**, 9. <http://doi.org/10.3390/toxics9080196>
87. Mai Z., Xiong X., Hu H., Jia J., Wu C., Wang G. Occurrence, distribution, and ecological risks of antibiotics in Honghu Lake and surrounding aquaculture ponds, China. *Environ Sci Pollut Res Int*, **2023**, 30, 50732-50742. <http://doi.org/10.1007/s11356-023-25931-8>
88. Mashile G.P. Pharmaceuticals and personal care products in wastewater, river water and tap water: occurrences and removal [M]. University of Johannesburg (South Africa), 2020.
89. Gray A.D., Todd D., Hershey A.E. The seasonal distribution and concentration of antibiotics in rural streams and drinking wells in the piedmont of North Carolina. *Sci Total Environ*, **2020**, 710, 136286. <http://doi.org/10.1016/j.scitotenv.2019.136286>
90. Gray A. The use of non-target high-resolution mass spectrometry screening to detect the presence of antibiotic residues in urban streams of Greensboro North Carolina. *J Environ Health Sci Eng*, **2021**, 19, 1313-1321. <http://doi.org/10.1007/s40201-021-00688-9>
91. Ebert I., Bachmann U., Kuster A., Kussatz C., Maletzki D., Schluter C. Toxicity of the fluoroquinolone antibiotics enrofloxacin and ciprofloxacin to photoautotrophic aquatic organisms. *Environ Toxicol Chem*, **2011**, 30, 2786-2792. <http://doi.org/10.1002/etc.678>
92. Andrieu M., Rico A., Phu T.M., Huong D.T.T., Phuong N.T., Van Den Brink P.J. Ecological risk assessment of the antibiotic enrofloxacin applied to Pangasius catfish farms in the Mekong Delta, Vietnam. *Chemosphere*, **2015**, 119, 407-414. <http://doi.org/10.1016/j.chemosphere.2014.06.062>
93. Wu M.N., Wang X.C., Ma X.Y. Phytotoxicity comparison of organic contaminants and heavy metals using *Chlorella vulgaris*. *Desalination and Water Treatment*, **2015**, 1-8. <http://doi.org/10.1080/19443994.2015.1110537>
94. Xiangping N. RESPONSE OF THE FRESHWATER ALGA CHLORELLA VULGARIS TO TRICHLOROISOCYANURIC ACID AND CIPROFLOXACIN (Abstract); proceedings of the American Chemical Society National Meeting, F, 2007 [C].
95. Zhu L., Santiago-Schubel B., Xiao H., Hollert H., Kueppers S. Electrochemical oxidation of fluoroquinolone antibiotics: Mechanism, residual antibacterial activity and toxicity change. *Water Res*, **2016**, 102, 52-62. <http://doi.org/10.1016/j.watres.2016.06.005>
96. Azevedo F.C.R., Vaz I.C.D., Barbosa F.A.R., Magalhães S.M.S. Toxicological effects of ciprofloxacin and chlorhexidine on growth and chlorophyll a synthesis of freshwater cyanobacteria. *Brazilian Journal of Pharmaceutical Sciences*, **2019**, 55. <http://doi.org/10.1590/s2175-97902019000217661>
97. April A., Robinson J.B.B., Lydy M.J. TOXICITY OF FLUOROQUINOLONE ANTIBIOTICS TO AQUATIC ORGANISMS. *Environmental Toxicology and Chemistry*, **2005**, 24, p.423-430.
98. Magdaleno A., Saenz M.E., Juarez A.B., Moreton J. Effects of six antibiotics and their binary mixtures on growth of *Pseudokirchneriella subcapitata*. *Ecotoxicol Environ Saf*, **2015**, 113, 72-78. <http://doi.org/10.1016/j.ecoenv.2014.11.021>
99. Jafari-Nodoushan H., Fazeli M.R., Faramarzi M.A., Samadi N. Hierarchically-structured laccase@Ni<sub>3</sub>(PO<sub>4</sub>)<sub>2</sub> hybrid nanoflowers for antibiotic degradation: Application in real wastewater effluent and toxicity evaluation. *Int J Biol Macromol*, **2023**, 234, 123574. <http://doi.org/10.1016/j.ijbiomac.2023.123574>
100. Kovalakova P., Cizmas L., Feng M., McDonald T.J., Marsalek B., Sharma V.K. Oxidation of antibiotics by ferrate(VI) in water: Evaluation of their removal efficiency and toxicity changes. *Chemosphere*, **2021**, 277, 130365. <http://doi.org/10.1016/j.chemosphere.2021.130365>
101. Carneiro R.B., Pozzi E., Corbi J.J., Zaiat M. Ecotoxicity and Antimicrobial Inhibition Assessment of Effluent from an Anaerobic Bioreactor Applied to the Removal of Sulfamethoxazole and Ciprofloxacin Antibiotics from Domestic Sewage. *Water, Air, & Soil Pollution*, **2021**, 232, 1-13.
102. Danner M.C., Azams S.O., Robertson A., Perkins D., Behrends V., Reiss J. It More than Adds Up: Interaction of Antibiotic Mixing and Temperature. *Life (Basel)*, **2021**, 11. <http://doi.org/10.3390/life11121435>
103. Nakata H., Kannan K., Jones P.D., Giesy J.P. Determination of fluoroquinolone antibiotics in wastewater effluents by liquid chromatography-mass spectrometry and fluorescence detection. *Chemosphere*, **2005**, 58, 759-766. <http://doi.org/10.1016/j.chemosphere.2004.08.097>
104. Kergaravat S.V., Hernandez S.R., Gagneten A.M. Second-, third- and fourth-generation quinolones: Ecotoxicity effects on *Daphnia* and *Ceriodaphnia* species. *Chemosphere*, **2021**, 262, 127823. <http://doi.org/10.1016/j.chemosphere.2020.127823>
105. Dalla Bona M., Zoukova R., Merlanti R., Blaha L., De Liguoro M. Effects of enrofloxacin, ciprofloxacin, and trimethoprim on two generations of *Daphnia magna*. *Ecotoxicol Environ Saf*, **2015**, 113, 152-158. <http://doi.org/10.1016/j.ecoenv.2014.11.018>
106. Bawa-Allah K.A., Ehimiyein A.O. Ecotoxicological effects of human and veterinary antibiotics on water flea (*Daphnia magna*). *Environ Toxicol Pharmacol*, **2022**, 94, 103932. <http://doi.org/10.1016/j.etap.2022.103932>
107. Dave G., Herger G. Determination of detoxification to *Daphnia magna* of four pharmaceuticals and seven surfactants by activated sludge. *Chemosphere*, **2012**, 88, 459-466. <http://doi.org/10.1016/j.chemosphere.2012.02.070>
108. Korschak M., Zubrod J.P., Baudy P., Fink P., Kenngott K., Luderwald S., Englert K., Jusi C., Schulz R., Bundschuh M. The importance of diet-related effects of the antibiotic ciprofloxacin on the leaf-shredding invertebrate Gammarus fossarum (Crustacea; Amphipoda). *Aquat Toxicol*, **2020**, 222, 105461. <http://doi.org/10.1016/j.aquatox.2020.105461>
109. Menz J., Baginska E., Arrhenius A., Haiss A., Backhaus T., Kummerer K. Antimicrobial activity of pharmaceutical cocktails in sewage treatment plant effluent - An experimental and predictive approach to mixture risk assessment. *Environ Pollut*, **2017**, 231, 1507-1517. <http://doi.org/10.1016/j.envpol.2017.09.009>
110. He S., Sun Q., Liu Y., Li L., Yang X. Acute Toxicity, Bioaccumulation, and Bioreduction of Two Antibiotics, Norfloxacin and Ofloxacin, in the Snail *Bellamya aeruginosa*. *Water, Air, & Soil Pollution*, **2020**, 231. <http://doi.org/10.1007/s11270-020-4458-5>
111. Eguchi K., Nagase H., Ozawa M., Endoh Y.S., Goto K., Hirata K., Miyamoto K., Yoshimura H. Evaluation of antimicrobial agents for veterinary use in the ecotoxicity test using microalgae. *Chemosphere*, **2004**, 57, 1733-1738. <http://doi.org/10.1016/j.chemosphere.2004.07.017>
112. Nie X., Gu J., Lu J., Pan W., Yang Y. Effects of norfloxacin and butylated hydroxyanisole on the freshwater microalga *Scenedesmus obliquus*. *Ecotoxicology*, **2009**, 18, 677-684. <http://doi.org/10.1007/s10646-009-0334-1>

- 
113. Montanes M.T., Garcia-Gabaldon M., Roca-Perez L., Giner-Sanz J.J., Mora-Gomez J., Perez-Herranz V. Analysis of norfloxacin ecotoxicity and the relation with its degradation by means of electrochemical oxidation using different anodes. *Ecotoxicol Environ Saf*, **2020**, 188, 109923. <http://doi.org/10.1016/j.ecoenv.2019.109923>
114. Rico A., Zhao W., Gillissen F., Lurling M., Van Den Brink P.J. Effects of temperature, genetic variation and species competition on the sensitivity of algae populations to the antibiotic enrofloxacin. *Ecotoxicol Environ Saf*, **2018**, 148, 228-236. <http://doi.org/10.1016/j.ecoenv.2017.10.010>
115. Magdaleno A., Carusso S., Moreton J. Toxicity and Genotoxicity of Three Antimicrobials Commonly Used in Veterinary Medicine. *Bull Environ Contam Toxicol*, **2017**, 99, 315-320. <http://doi.org/10.1007/s00128-017-2091-9>
116. Tolosi R., De Liguoro M. Delayed toxicity of three fluoroquinolones and their mixtures after neonatal or embryonic exposure, in *Daphnia magna*. *Ecotoxicol Environ Saf*, **2021**, 225, 112778. <http://doi.org/10.1016/j.ecoenv.2021.112778>
117. Tasso L., De Andrade C., Dalla Costa T. Pharmacokinetic/pharmacodynamic modelling of the bactericidal activity of free lung concentrations of levofloxacin and gatifloxacin against *Streptococcus pneumoniae*. *Int J Antimicrob Agents*, **2011**, 38, 307-313. <http://doi.org/10.1016/j.ijantimicag.2011.05.015>
118. Brain R.A., Johnson D.J., Richards S.M., Hanson M.L., Sanderson H., Lam M.W., Young C., Mabury S.A., Sibley P.K., Solomon K.R. Microcosm evaluation of the effects of an eight pharmaceutical mixture to the aquatic macrophytes *Lemna gibba* and *Myriophyllum sibiricum*. *Aquat Toxicol*, **2004**, 70, 23-40. <http://doi.org/10.1016/j.aquatox.2004.06.011>
119. Li Z., Gao X., Bao J., Li S., Wang X., Li Z., Zhu L. Evaluation of growth and antioxidant responses of freshwater microalgae *Chlorella sorokiniana* and *Scenedesmus dimorphus* under exposure of moxifloxacin. *Sci Total Environ*, **2023**, 858, 159788. <http://doi.org/10.1016/j.scitotenv.2022.159788>
120. Wan L., Wu Y., Zhang B., Yang W., Ding H., Zhang W. Effects of moxifloxacin and gatifloxacin stress on growth, photosynthesis, antioxidant responses, and microcystin release in *Microcystis aeruginosa*. *J Hazard Mater*, **2021**, 409, 124518. <http://doi.org/10.1016/j.jhazmat.2020.124518>
121. Gilroy E.A., Klinck J.S., Campbell S.D., Mcinnis R., Gillis P.L., De Solla S.R. Toxicity and bioconcentration of the pharmaceuticals moxifloxacin, rosvastatin, and drospirenone to the unionid mussel *Lampsilis siliquoidea*. *Sci Total Environ*, **2014**, 487, 537-544. <http://doi.org/10.1016/j.scitotenv.2014.03.051>
122. De Orte M.R., Carballeira C., Viana I.G., Carballeira A. Assessing the toxicity of chemical compounds associated with marine land-based fish farms: The use of mini-scale microalgal toxicity tests. *Chemistry and Ecology*, **2013**, 29, 554-563. <http://doi.org/10.1080/02757540.2013.790381>
123. Van Der Grinten E., Pikkemaat M.G., Van Den Brandhof E.J., Stroomberg G.J., Kraak M.H. Comparing the sensitivity of algal, cyanobacterial and bacterial bioassays to different groups of antibiotics. *Chemosphere*, **2010**, 80, 1-6. <http://doi.org/10.1016/j.chemosphere.2010.04.011>
124. Zounkova R., Klimesova Z., Nepejchalova L., Hilscherova K., Blaha L. Complex evaluation of ecotoxicity and genotoxicity of antimicrobials oxytetracycline and flumequine used in aquaculture. *Environ Toxicol Chem*, **2011**, 30, 1184-1189. <http://doi.org/10.1002/etc.486>
125. Lalumera G.M., Calamari D., Galli P., Castiglioni S., Crosa G., Fanelli R. Preliminary investigation on the environmental occurrence and effects of antibiotics used in aquaculture in Italy. *Chemosphere*, **2004**, 54, 661-668. <http://doi.org/10.1016/j.chemosphere.2003.08.001>
126. Carballeira C., De Orte M.R., Viana I.G., Delvalls T.A., Carballeira A. Assessing the toxicity of chemical compounds associated with land-based marine fish farms: the sea urchin embryo bioassay with *Paracentrotus lividus* and *Arbacia lixula*. *Arch Environ Contam Toxicol*, **2012**, 63, 249-261. <http://doi.org/10.1007/s00244-012-9769-0>
